# 1 **Identification of a new, Rab14-dependent, endo-lysosomal pathway**

2 Evgeniya Trofimenko<sup>1</sup>, Yuta Homma<sup>2</sup>, Mitsunori Fukuda<sup>2</sup> and Christian Widmann<sup>1,3</sup>

3

4 <sup>1</sup>Department of Biomedical Sciences, University of Lausanne, Lausanne, Switzerland

5 <sup>2</sup>Laboratory of Membrane Trafficking Mechanisms, Department of Integrative Life  
6 Sciences, Graduate School of Life Sciences, Tohoku University, Sendai, Miyagi, Japan

7

8

9 <sup>3</sup>Corresponding author

10

11

12

13

14 Keywords: endocytosis, endosomes, Rab5, Rab7, Rab14, cell-penetrating peptides,

15 homeodomains, homeoproteins, polyamines

16

17

18

19 Address correspondence: Christian Widmann, Department of Biomedical Sciences,

20 Rue du Bugnon 7, 1005 Lausanne, Switzerland, Phone: +41 21 692 5123, Fax: +41

21 21 692 5505, E-mail: [Christian.Widmann@unil.ch](mailto:Christian.Widmann@unil.ch).

22

## 23 **Summary**

24 Cells can endocytose material from the surrounding environment. Endocytosis and  
25 endosome dynamics are controlled by proteins of the small GTPase Rab family.  
26 Several endocytosis pathways have been described (e.g. clathrin-mediated  
27 endocytosis, macropinocytosis, CLIC/GEEC pathway). Besides possible recycling  
28 routes to the plasma membrane and various organelles, these pathways all appear to  
29 funnel the endocytosed material to Rab5-positive early endosomes that then mature  
30 into Rab7-positive late endosomes/lysosomes. By studying the uptake of a series of  
31 cell-penetrating peptides (CPPs) used in research and clinic, we have discovered a  
32 second endocytic pathway that moves material to late endosomes/lysosomes and that  
33 is fully independent of Rab5 and Rab7 but requires the Rab14 protein. This newly  
34 identified pathway differs from the conventional Rab5-dependent endocytosis at the  
35 stage of vesicle formation already and is not affected by a series of compounds that  
36 inhibit the Rab5-dependent pathway. The Rab14-dependent pathway is also used by  
37 physiological cationic molecules such as polyamines and homeodomains found in  
38 homeoproteins. Rab14 is expressed by the last eukaryotic common ancestor. The  
39 Rab14-dependent pathway may therefore correspond to a primordial endosomal  
40 pathway taken by cationic cargos.

41

## 42 **Introduction**

43 Endocytosis is a major entry route used by cells to take up a variety of extracellular  
44 substances ranging from nutrients, fluid phase material, growth factors, hormones,  
45 receptors, cellular penetrating peptides (CPPs), viruses or bacteria. Various forms of  
46 endocytosis have been described, the main routes being clathrin-mediated  
47 endocytosis, macropinocytosis, and the clathrin-independent  
48 carrier/glycosylphosphatidylinositol-anchored protein enriched endocytic compartment  
49 (CLIC/GEEC) pathway [reviewed in <sup>1-5</sup>]. Which form of endocytosis is used and the  
50 ultimate fate of the endocytosed material depend on the nature of the substances being  
51 taken up by cells.

52 Endocytic vesicles (endosomes) are formed by membrane invaginations, actin-driven  
53 membrane protrusions (in the case of macropinocytosis for example), or ruffling. In the  
54 case of clathrin-mediated endocytosis, vesicle formation is triggered through the  
55 detection of the endosomal cargo by AP2 adaptor domains and subsequent  
56 recruitment of clathrin triskelions <sup>6,7</sup>. Several AP2 adaptors bound to the plasma  
57 membrane through PI(4,5)P<sub>2</sub> are necessary for efficient clathrin binding <sup>7</sup>.  
58 Accumulation of AP2/clathrin complexes (within seconds) at the membrane leads to  
59 membrane bending and endocytic vesicle formation <sup>6-8</sup>.

60 Endosomes are dynamic structures that undergo fusion and fission events <sup>9</sup>. Early  
61 endosomes mature into multivesicular bodies (MVBs), late endosomes and finally  
62 lysosomes, where degradation of the endocytosed material occurs <sup>10,11</sup>. The  
63 endocytosed material can also be recycled back to the plasma membrane or trafficked  
64 towards other cellular compartments <sup>10-12</sup>.

65 Each stage of endosomal maturation is meticulously controlled by the sequential  
66 recruitment of various endosomal protein and lipids. For example, on the early  
67 endosomes, Rab5, activated by its guanine exchange factor (GEF) Rabex-5, controls  
68 local generation of PI(3)P by recruiting the Vps34 PI3 kinase. This in turn leads to  
69 recruitment of EEA1 via its capacity to bind PI(3)P through its FYVE domain. EEA1  
70 can also directly interact with the active GTP-bound form of Rab5. The ability of EEA1  
71 to bind simultaneously Rab5 and PI(3)P on separate vesicles makes it a tethering  
72 protein that contributes to endosomal fusion <sup>13</sup>. Vps34 knock-out in mammalian cells  
73 leads to enlarged early endosomes and interruption of the progression of endocytosed  
74 cargo to lysosomes <sup>14</sup>. Vesicle maturation proceeds through the recruitment of the  
75 Mon1-Ccz1 complex that interacts with Rab5 and PI(3)P. The Mon1-Ccz1 complex has  
76 a GEF activity towards Rab7 that leads to the activation of this small GTPase on  
77 endosomes [reviewed in <sup>11,15</sup>]. Concomitantly, Rab5 GTPase-activating protein (GAP)  
78 turns off Rab5 and promotes release of the latter from early endosomes. Hence, Rab5  
79 and Rab7 regulate essential steps in the endocytic pathway that moves endocytosed  
80 material to lysosome. The Rab5/Rab7-controlled endocytic pathway is currently the  
81 only molecularly characterized route taken by endocytosed material that end up in  
82 lysosomes <sup>2,5,15</sup>.

83 In this study we show that endocytosed CPPs, homeoproteins, and polyamines, follow  
84 a newly discovered endosomal pathway towards lysosomes that requires Rab14 but  
85 not Rab5 or Rab7. Endocytosis of CPPs is also unaffected by phosphoinositide 3-  
86 kinase (PI3K) inhibitors or various pharmacological agents known to inhibit the uptake  
87 of classical cargos such as transferrin and dextran. This work therefore defines a  
88 second independent endocytic maturation pathway that moves endocytosed material  
89 to lysosomes.

91 Results

92 **CPPs employ unconventional endocytosis**

93 CPPs can be used for intracellular transport of bioactive cargo into cells <sup>16-28</sup>. Various  
94 non-exclusive mechanisms of CPP endocytosis have been proposed <sup>16-23,27,29-31</sup>.  
95 However, there is no consensus and clarity regarding the precise nature of the  
96 endosomal pathway used by CPPs and its underlying mechanisms. CPPs additionally  
97 enter cells through direct translocation via water pores that are formed as a  
98 consequence of membrane megapolarization induced by the CPP themselves and the  
99 activity of potassium channels <sup>32</sup>. Direct translocation can be inhibited through plasma  
100 membrane depolarization or invalidation of specific potassium channels (e.g. KCNN4  
101 in HeLa cells), without affecting endocytosis of CPPs <sup>32</sup>, transferrin <sup>33</sup> or vesicular  
102 stomatitis virus (VSV) <sup>33</sup>. Here, we took advantage of KCNN4 knockout HeLa cells to  
103 study specifically endocytosis in the absence of possible confounding effects mediated  
104 by CPP direct translocation. To investigate the endocytic pathway employed by CPPs,  
105 we phenotypically characterized CPP containing vesicles (Figure S1A-B) for the  
106 presence of early (Rab5 and EEA1) and late (Rab7 and Lamp1) endosomal markers.  
107 We selected five most commonly used CPPs in research and in clinic (TAT, R9,  
108 Penetratin, MAP and Transportan) as well as TAT-RasGAP<sub>317-326</sub>, a prototypical TAT-  
109 cargo complex <sup>32,34-44</sup>. Pulse-chase experiments (Figure 1A-B and S1B) demonstrated  
110 colocalization of transferrin, EGF and dextran with EEA1, Rab5A and Rab5B at early  
111 time points, and Rab7 and Lamp1 at later time points. These results are consistent  
112 with previous knowledge that these molecules enter cells through clathrin-mediated  
113 endocytosis (transferrin and EGF) and macropinocytosis (dextran). To ensure that  
114 ectopic expression of endosomal markers does not interfere with normal endocytosis,  
115 we compared the pattern of EEA1-positive and Lamp1-positive vesicle, which we found

116 to be qualitatively similar in control cells and in cells expressing ectopic GFP-tagged  
117 versions of these markers (Figure S1C). Moreover, ectopic expression of the tagged  
118 EEA1 and Lamp1 constructs did not alter the kinetics of transferrin colocalization with  
119 EEA1- or Lamp1-positive vesicles (Figure S1D). These results indicate that ectopic  
120 expression of fluorescent endosomal markers, in live cells in particular, does not  
121 appear to affect endocytic processes. CPPs were found in EEA1- and Lamp1-positive  
122 vesicles at early and late time points, respectively (Figure 1A-B and S1A) but  
123 surprisingly only a minority of CPP-containing vesicles were positive for Rab5 and  
124 Rab7 (Figure 1A-B). Even though the selected CPPs have different physico-chemical  
125 properties they all carry positive charges within their sequence and appear to be found  
126 in the same endocytic vesicles (Figure S1E).

127 To rule out that association of Rab5 with CPP-containing vesicles could be transient,  
128 we performed experiments at 20°C such that endosomal maturation is considerably  
129 slowed down, as can be observed for transferrin (Figure 1C, left). However, CPP-  
130 positive endosomes remained mostly Rab5-negative (Figure 1C). Additionally, Rab5-  
131 and Rab7-positive CPP-containing vesicles were only marginally detected in the  
132 continuous presence of the CPPs despite extensive colocalization with EEA1 (Figure  
133 S1F). High resolution confocal images showed that TAT was found inside EEA1-  
134 positive vesicles already a few minutes after being added to cells (Figure 1D)  
135 confirming that CPPs are indeed located in EEA1-positive endosomes. In addition,  
136 TAT-RasGAP<sub>317-326</sub> did not interfere with the progression of transferrin through early  
137 and late endosomes (Figure S1G) and did not lead to generation of aberrant  
138 endosomes bearing EEA1 and Lamp1 at the same time (Figure S1H). This indicates  
139 that CPPs do not reprogram the manner by which cells take up material through  
140 classical endocytosis. Lack of colocalization with Rab5A and Rab7 was observed

141 previously for tryptophane/arginine-rich peptide WRAP linked to siRNA <sup>45</sup>. Additionally,  
142 based on visual inspection of representative images in literature, R8 and TAT also  
143 colocalize only partially with Rab5A <sup>46</sup>.

144 We then used pharmacological agents such as EIPA <sup>47</sup>, IPA3 <sup>48,49</sup>, ML7 <sup>50,51</sup>,  
145 Jasplakinolide <sup>52</sup> and Cytochalasin D <sup>53,54</sup> that block distinct steps of endocytic vesicle  
146 formation and maturation, such as actin filament polymerization, Na<sup>+</sup>/H<sup>+</sup> exchange  
147 inhibition, as well as macropinosome formation and closure, to determine whether  
148 these steps are parts of the CPP endocytic pathway. We observed no effect of these  
149 inhibitors on the internalization of TAT-RasGAP<sub>317-326</sub> in contrast to what was seen for  
150 dextran uptake (Figure S2A-B). Additionally, as opposed to transferrin internalization,  
151 the early stages of CPP endocytosis were dynamin-independent (Figure S2C).

152 Lipids such as phosphoinositides (PIs) that can be phosphorylated at positions 3, 4, or  
153 5 of the inositol ring, represent another type of markers of endocytosis. For example,  
154 PI(4,5)P<sub>2</sub> is enriched in the plasma membrane, whereas PI(3)P and PI(3,5)P<sub>2</sub> are  
155 enriched in early and late endosomes, respectively, and participate in their formation  
156 [reviewed in <sup>55-59</sup>]. In conventional endocytosis, EEA1 is recruited to early endosomes  
157 through interactions with Rab5 and PI(3)P <sup>60-62</sup>. The latter is produced by Vps34, a PI3-  
158 kinase that is also recruited by Rab5. We therefore, used pan-PI3K inhibitors  
159 (wortmannin and LY294002) and assessed the colocalization between selected  
160 endosomal material and EEA1 or Lamp1. Our data show that, in the presence of  
161 LY294002, transferrin and dextran endosomal maturation and progression was halted,  
162 consistent with observations reported in the literature <sup>14,63</sup> (Figure 2A and S2D).  
163 However, colocalization between CPPs and EEA1 or Lamp1 was not affected (Figure  
164 2A). Furthermore, depletion of PI(3,4)P<sub>2</sub>, enriched on the plasma membrane <sup>59</sup>, blocks

165 the maturation of clathrin-coated vesicles prior to their fission from the plasma  
166 membrane <sup>64</sup>, and prevents macropinosome closure <sup>65,66</sup>. As these events precede  
167 Rab5 recruitment, we next determined whether the presence of wortmannin, which at  
168 high micromolar concentrations, besides PI(3)P depletion, additionally inhibits PI4-  
169 kinases <sup>67,68</sup> and leads to depletion of PI(3,4,5)P<sub>3</sub> <sup>69</sup> and PI(3,4)P<sub>2</sub> <sup>70,71</sup>, would have an  
170 effect on CPP endocytosis. Indeed, wortmannin treatment almost fully inhibited the  
171 endocytosis of transferrin and dextran, as opposed to the tested CPPs, where the  
172 number of vesicles was either only marginally reduced (R9) or remained unchanged  
173 (TAT) (Figure 2B).

174 Even though previous studies have shown some contradictory results of CPP  
175 internalization in the presence of the endocytic inhibitors used in this study [decreased  
176 uptake <sup>46,72-74</sup>, no effect <sup>45,74-76</sup>, increased uptake <sup>77</sup>], our data clearly indicate that CPPs  
177 enter cells through an uncharacterized endocytic pathway, which differs from classical  
178 endocytosis already at the stage of endocytic vesicle formation.

179

### 180 **Rab14 is required for the maturation of CPP-containing endosomes**

181 All previously characterized endocytic pathways appear to converge to Rab5-positive  
182 vesicles <sup>1,2,78-87</sup>. In the absence of Rab5, the number of maturing endocytic vesicles is  
183 decreased and endocytosis is halted <sup>62</sup>. To determine whether EEA1 recruitment to  
184 CPP-positive vesicles occurs in the absence of Rab5, we took advantage of a knockout  
185 Rab library in MDCK cells, which consists of single and multiple knockouts (>50 cell  
186 lines) targeting either different protein isoforms or multiple Rab proteins simultaneously  
187 <sup>88</sup>. This library includes a Rab5 conditional knockout cell line, where Rab5A, B and C  
188 isoforms have been knocked out and replaced by a Rab5A version that can be  
189 degraded through auxin-induced ubiquitination upon addition of indole-3-acetic acid



190 (IAA)<sup>89</sup> (Y. Homma et al., manuscript in preparation) (Figure S3A). The recruitment of  
191 EEA1 (15 minutes post incubation), as well as Lamp1 (30 minutes post incubation) to  
192 TAT-containing vesicles was not affected by the absence of Rab5 (Figure 3 and S3B).  
193 Furthermore, inhibiting Rab5 with dominant-negative constructs (Rab5A S34N, Rab5B  
194 S34N or Rab5C S35N) in HeLa cells, while reducing the percentage of EEA1-positive  
195 transferrin- and dextran-containing vesicles, as expected, had no significant effect on  
196 the percentage of EEA1-positive (Figure S3C-D) or Lamp1-positive (Figure S3E) CPP-  
197 containing endosomes. This set of data argues against a role of Rab5 isoforms in the  
198 maturation of CPP-containing endosomes and for EEA1 recruitment on these  
199 endosomes.

200 Using a candidate-based approach and the Blastp database, we identified a subset of  
201 candidate proteins with amino acid sequence similarity to Rab5. Using GPS Protein  
202 (<http://gpsprot.org/navigator.php?q=84111>), a database of protein-protein interactions,  
203 we restricted the pool of these Rab5-like proteins to those that have the potential to  
204 interact with EEA1. We identified three top candidates using this approach: Rab14,  
205 Rab22 and Rab31 (also known as Rab22B). Additionally, Rab21 bears sequence  
206 similarity to Rab5 and colocalizes with early endosomal markers (Rab5 and EEA1<sup>90-</sup>  
207 <sup>92</sup>). Rab14 colocalizes with early endosomal markers<sup>93-95</sup>, but not late endosomal  
208 markers<sup>93,95,96</sup> (Figure S4) and has so far been shown to be involved in endosomal  
209 recycling<sup>97</sup>, endosome-endosome fusion, and MHC class I cross presentation<sup>96</sup>.  
210 Rab14 and Rab22 are both involved in endosome to Golgi trafficking<sup>93,95,98</sup>, and Rab31  
211 plays a role in Golgi-endosome directional transport<sup>99</sup>. Rab22 can directly interact with  
212 EEA1<sup>98,100</sup>, supporting the hypothesis that it could function in a manner similar to  
213 Rab5. Our data showed that Rab14, Rab21 and Rab22 colocalize relatively frequently  
214 (as opposed to Rab31) with transferrin<sup>93,94</sup>, and CPPs, as well as to a lesser extent

215 with dextran (Figure S5A). Furthermore, dominant-negative versions of these proteins  
216 (Rab14 S25N, Rab14 N124I, Rab21 T31N, Rab22 S19N) were used to assess the role  
217 of the respective Rab proteins in CPP-containing vesicle maturation. Figure S5 shows  
218 diminished colocalization between CPPs and EEA1 in cells expressing Rab14 S25N  
219 and Rab14 N124I, but not in cells expressing the other dominant negative mutants.  
220 Rab14 is therefore a strong candidate that can substitute for Rab5 function in the  
221 recruitment of EEA1 to maturing CPP-containing endosomes. The colocalization  
222 between transferrin, as well as dextran and EEA1 appears not to be affected in the  
223 Rab14 dominant negative background (Figure S5B). Similarly, earlier work has  
224 reported that EEA1 colocalization with mannose receptors <sup>96</sup> or with EGF <sup>95</sup> is not  
225 affected when Rab14 is depleted in cells.

226 We then used a MDCK-II comprehensive Rab knock-out library to test whether  
227 colocalization between CPPs and EEA1 or Lamp1 is affected by the depletion of  
228 various Rab protein isoforms at 15- and 30-minutes post incubation. The obtained data  
229 further support the involvement of Rab14 in the maturation of CPP-containing vesicles  
230 (Figure 3). Surprisingly, none of the other tested single or multiple Rab knockouts had  
231 an effect on EEA1 or Lamp1 recruitment to CPP-positive endosomes (Figure 3). Taken  
232 together our data demonstrates that ensuing their uptake by cells, CPPs follow a Rab5-  
233 independent, Rab14-dependent endocytic route.

234

### 235 **Homeoproteins and polyamines use the same endocytic pathway as CPPs**

236 Homeoproteins (HPs) are a family of transcription factors involved in multiple biological  
237 processes <sup>101-104</sup>. Additionally, HPs, such as Engrailed 2 and OTX2, exhibit therapeutic  
238 properties <sup>105-110</sup>. The vast majority of HPs contain a conserved 60 amino-acids domain

239 called the homeodomain (HD) that carries HP internalization and secretion motifs.  
240 Interestingly, the HP internalization motifs bear CPP sequences <sup>101,103</sup>. We therefore  
241 hypothesized that HDs could be endocytosed similarly as CPPs. Through  
242 colocalization experiments we determined that there is indeed colocalization between  
243 HD-containing endosomes and the EEA1 or Lamp1 markers, and that their  
244 colocalization with Rab5A or Rab7A is only marginal (Figure 4A, left). As for CPPs,  
245 EEA1 and Lamp1 recruitment to HD-positive endosomes was significantly reduced in  
246 cells lacking Rab14 (Figure 4B, left). This indicates that HDs follow a Rab5-  
247 independent, Rab14-dependent endosomal pathway. Polyamines are small signaling  
248 molecules involved in numerous cellular processes (gene regulation, cell proliferation,  
249 cell survival and cell death) <sup>111-115</sup>. In mammalian cells polyamines enter cells through  
250 endocytosis <sup>116-119</sup>, and possibly also through a polyamine specific transporter <sup>117</sup>.  
251 Polyamine-containing vesicles mature to Lamp1-containing acidic endosomes and are  
252 then exported into the cytosol <sup>119</sup>. The mechanism of polyamines endocytosis has not  
253 been described at the molecular level. Similarly, to CPPs and HDs, polyamine-  
254 containing vesicles colocalized only marginally with Rab5A and Rab7A markers and  
255 their maturation down to Lamp1-containing endosomes was Rab14-dependent (Figure  
256 4A-B, right and S6). These data indicate that physiological molecules such as  
257 polyamines, and by extension homeoproteins if they behave like their homeodomains,  
258 do not enter cells through the classical Rab5-dependent endocytic route but via a  
259 Rab14-dependent pathway.

260

## 261 **Discussion**

262 We have characterized a previously undescribed Rab5-independent, Rab14-  
263 dependent endosomal pathway. In this pathway, EEA1 is recruited to early endosomes  
264 in the absence of Rab5 (Figures 1, 3 and S3) and endosomal maturation requires  
265 Rab14 (Figures 3 and S5). This pathway appears to differ from previously described  
266 endocytosis already at the early stages of vesicle formation (Figure 2). We showed  
267 that synthetic molecules as CPP, as well as physiological molecules such as  
268 polyamines take advantage of the Rab5-independent, Rab14-dependent pathway to  
269 enter cells and reach lysosomes.

270 The molecules that we have found to be endocytosed via the Rab14-dependent  
271 pathway are characterized by their strong cationic nature. As Rab14 is expressed in  
272 most tissues (according to Protein Atlas and CCLE database) and seems to be present  
273 in the last eukaryote common ancestor<sup>97,120</sup>, it is possible that Rab14 is involved in a  
274 primordial endosomal pathway taken by cationic cargos. Whether this pathway is used  
275 by other types of cargos can now be assessed functionally in cells in which Rab14 is  
276 inactivated or invalidated.

277 Besides Rab14, no other Rab proteins could be evidenced to play a role in maturation  
278 of the endocytic pathway taken by CPPs, HDs, or polyamines. In particular, we did not  
279 find a Rab7 homolog that would be required for the acquisition of the Lamp1 marker in  
280 this pathway. Either Rab14 is the sole Rab necessary for cargo progression along the  
281 endocytic pathway used by CPPs, HDs, or polyamines or there is an as yet unknown  
282 Rab isoform that is redundant with Rab7 in this pathway. Because there is only  
283 marginal colocalization between Rab14 and Lamp1<sup>93,96</sup> (Figure S4), the possibility that  
284 Rab14 plays a dual role in the recruitment of EEA1 and Lamp1 is unlikely. Based on

285 phylogeny and clustering analysis <sup>95,97,120</sup>, Rab7 is most closely related to Rab9.  
286 However, cells lacking both Rab7 and Rab9 were not compromised in their ability to  
287 move cationic cargos along the Rab14-dependent pathway all the way down to Lamp1-  
288 containing vesicles (Figure 3). The Rab isoform that is redundant with Rab7, if it exists,  
289 remains therefore to be discovered.

290 There was minimal colocalization between CPP-, HP- or polyamine-containing  
291 endosomes and the Rab5 and Rab7 endosomal markers. This marginal entry could  
292 correspond to non-selective bulk liquid uptake, as it occurs during macropinocytosis  
293 <sup>121</sup>. Alternatively, a small fraction of these cargos may enter the Rab5-dependent  
294 endosomal pathway as previously reported for CPPs <sup>16,18-23</sup>.

295 There have been earlier circumstantial indications of the existence of a Rab5-  
296 independent pathway specifically in the context of viral infections, as well as trafficking  
297 to yeast vacuole <sup>122,123</sup>. It has been shown that some viruses use unconventional  
298 endocytosis, such as Herpes Simplex Virus 1 <sup>124</sup>, SARS <sup>125</sup>, Lassa virus, the Amr53b  
299 and We54 strains of LCMV (lymphocytic choriomeningitis virus) <sup>126-129</sup>, Lujo virus <sup>130,131</sup>  
300 and some influenza A strains <sup>132</sup> that appear to skip the early Rab5-positive  
301 endosomes. Rab14 also appears to be involved in viral trafficking, more specifically in  
302 the endocytosis of Ebola virus matrix protein VP40 <sup>133</sup>. Additionally, Rab14 depletion  
303 delayed *Candida albicans*- containing phagosome maturation to Lamp1, even though  
304 Rab5 and Rab7 markers were still present during the maturation process <sup>134</sup>. Possibly,  
305 the Rab5-independent, Rab14-dependent endosomal pathway is used by some  
306 pathogens to infect cells. Therefore, our findings may not only concern the  
307 physiological delivery of cationic cargo into cells, but could also be relevant for the  
308 search of anti-viral or antimicrobial drugs.

## 309 **Author contributions**

310 Conception and design of study: ET and CW

311 Acquisition of data: ET

312 Analysis and/or interpretation of data: ET, YH, MF and CW

313 Funding acquisition: YH, MF and CW

314 Resources: MF and CW

315 Drafting the manuscript: ET and CW

316 Revising the manuscript and approval of the submitted version: all authors

317

## 318 **Acknowledgements**

319 The laboratory of YH is supported by Grant-in-Aid for Young Scientists from the  
320 Ministry of Education, Culture, Sports, Science and Technology (MEXT) of Japan  
321 (grant number 20K15739). The laboratory of MF is supported by Grant-in-Aid for  
322 Scientific Research(B) from the MEXT (grant number 19H03220) and Japan Science  
323 and Technology Agency (JST) CREST (grant number JPMJCR17H4). We are thankful  
324 to the Cellular Imaging Facility and Bioinformatics Competence Centre at the  
325 University of Lausanne for the resources provided and their technical help.

326

## 327 **Competing interests**

328 Authors declare no competing financial and non-financial interests.

329

## 330 **Materials & Correspondence**

331 Correspondence and requests for materials should be addressed to CW.

332

333 **MATERIAL AVAILABILITY**

334 Further information and requests for resources and reagents should be directed to and  
335 will be fulfilled by Christian Widmann ([christian.widmann@unil.ch](mailto:christian.widmann@unil.ch)). Plasmids  
336 generated in this study will be deposited to Addgene. This study did not generate any  
337 new unique reagents.

338

339 **EXPERIMENTAL MODEL AND SUBJECT DETAILS**

340 **Cell lines**

341 All cell lines were cultured in 5% CO<sub>2</sub> at 37°C. HeLa (ATCC: CCL-2) cells were cultured  
342 in RPMI media (Thermo Fisher, Cat# 61870044) supplemented with 10% heat-  
343 inactivated fetal bovine serum (FBS; Thermo Fisher, Cat# 10270-106). MDCK-II  
344 parental and knock-out cell lines<sup>99</sup> (available from RIKEN BioResource Research  
345 Center Cell Bank (<https://cell.brc.riken.jp/en>); Cat#: RCB5099–RCB5148) were  
346 cultured in DMEM (Thermo Fisher, Cat# 10566016). MDCK-II Rab5 knock-out and  
347 degron-Rab5A-expressing cell line will be described elsewhere (Homma et al.,  
348 manuscript in preparation).

349

350 **REAGENTS**

351 **Chemicals**

352 Live Hoechst 33342 (Sigma, Cat# CDS023389) was aliquoted and stored at -20°C.  
353 AlexaFluor488-, AlexaFluor568-, AlexaFluor647-labeled human transferrin was  
354 dissolved in PBS at 5 mg/ml and stored at 4°C (Thermo Fisher, Cat# T13342, T23365  
355 and T23366). TMR-labelled 10,000 neutral dextran was dissolved in PBS at 10 mg/ml  
356 and stored at -20°C (Thermo Fisher, Cat# D1816). AlexaFluor647-labeled and  
357 biotinylated epidermal growth factor (EGF) was dissolved in water at 1 mg/ml,

358 aliquoted and stored at -20°C (Thermo Fisher Cat# E35351). EIPA (stock  
359 concentration 10 mM), IPA3 (stock concentration 5 mM), ML7 (stock concentration 10  
360 mM), CytoD (stock concentration 1 mM), Jas (stock concentration 1 mM) a kind gift  
361 from Stefan Kunz laboratory, were dissolved in DMSO, aliquoted and stored at -20°C.  
362 LY294002 was dissolved in DMSO at 20 mg/ml, aliquoted and stored at -20°C (Sigma  
363 Aldrich, Cat# 440202). Wortmannin was aliquoted and stored at -20°C (Sigma Aldrich,  
364 Cat# W1344). Indole-3-acetic acid (IAA) (Sigma-Aldrich, Cat# I2886) was dissolved in  
365 ethanol, aliquoted and stored at -20°C. Doxycycline (Sigma-Aldrich, Cat# D3447) was  
366 dissolved in DMSO, aliquoted and stored at -20°C.

367

## 368 **Antibodies**

369 The mouse monoclonal anti-EEA1, stored at -20°C (BD Transduction Laboratories,  
370 Cat# 610457) and anti-Lamp1, stored at 4°C (BD Pharmingen, Cat# 555798)  
371 antibodies were used in immunofluorescence experiments. Donkey polyclonal anti-  
372 mouse Cy3 secondary antibody was aliquoted and stored at -20°C in glycerol (Jackson  
373 ImmunoResearch, Cat# 715-165-150). Phospho-AKT (Ser473) rabbit polyclonal  
374 antibody was stored at -20°C (Cell signaling, Cat# 92715) and was used for western  
375 blotting. Anti-Rab5C antiserum, which can recognize all three Rab5 isoforms <sup>135</sup>, was  
376 stored at -20°C.

377

## 378 **METHOD DETAILS**

### 379 **Confocal microscopy**

380 Confocal microscopy experiments were done on live cells. Cells were seeded onto  
381 glass bottom culture dishes (MatTek, corporation Cat# P35G-1.5-14-C) and treated as  
382 described in the Figures. For nuclear staining, 10 µg/ml live Hoechst 33342 (Molecular



383 probes, Cat# H21492) was added in the culture medium 5 minutes before washing  
384 cells twice with media. After washing, cells were examined at the indicated time point  
385 with a plan Aplanachromat 63x oil immersion objective mounted on a Zeiss LSM 780 laser  
386 scanning fluorescence confocal microscope equipped with gallium arsenide phosphide  
387 detectors and three lasers (a 405 nm diode laser, a 458-476-488-514 nm argon laser,  
388 and a 561 nm diode-pumped solid-state laser). Cell images were acquired at a focal  
389 plane near the middle of the cell making sure that nuclei were visible. Experiments at  
390 20°C were done using an incubation chamber set at 20°C, 5% CO<sub>2</sub> and visualized with  
391 a Zeiss LSM710 Quasar laser scanning fluorescence confocal microscope equipped  
392 with either Neofluar 63x, 1.2 numerical aperture (NA) or plan Neofluar 100x, 1.3 NA  
393 plan oil immersion objective (and the same lasers as above).

394

### 395 **Colocalization**

396 Colocalization assessment between endocytosed material and a given endosomal  
397 marker was performed on confocal images by visual assessment, switching back and  
398 forth between the color channels. The samples were randomized to blind the  
399 experimentators from the nature of the samples they were analyzing. The  
400 randomization script is available at <https://github.com/BICC-UNIL-EPFL/randomizer>.  
401 The visual quantitation was validated by Mander's coefficient calculation performed on  
402 the same samples using the JaCoP plugin in ImageJ. Examples of colocalization  
403 quantitation analysis is shown in Figure S1A.

404

### 405 **Immunofluorescence**

406 Immunofluorescence experiments for the localization of endogenous and ectopically  
407 expressed EEA1 and Lamp1 endosomal markers was performed as described <sup>57</sup>.

408 Briefly, cells were plated on poly L-lysine-coated coverslips and fixed with 4%  
409 paraformaldehyde for 20 minutes at room temperature at the indicated time points after  
410 treatment. Following a 5-minute permeabilization at room temperature in PBS, 0.25%  
411 triton X100, the samples were blocked for 20 minutes at room temperature in PBS, 3%  
412 BSA. Incubation with primary antibodies was done for two hours at room temperature  
413 in PBS, 1% BSA. The cells were then incubated for 45 minutes at room temperature  
414 with Cy3-labelled secondary antibodies in the same buffers as above. Coverslips were  
415 finally incubated 5 minutes with PBS, 10  $\mu$ g/ml Hoechst. Three PBS washes were done  
416 between each incubation steps. Coverslips were mounted in Fluoromount-G  
417 (cBioscience, Cat# 00-4958-02). Samples were visualized with a Zeiss LSM780  
418 confocal microscope.

419

#### 420 **Transient transfection**

421 Calcium phosphate based transfection of HeLa cells was performed as previously  
422 described<sup>136</sup>. Briefly, cells were plated overnight in DMEM (Invitrogen, Cat# 61965)  
423 medium supplemented with 10% heat-inactivated FBS (Invitrogen, Cat# 10270-106),  
424 2.5  $\mu$ g of total plasmid DNA of interest was diluted in water,  $\text{CaCl}_2$  was added and the  
425 mixture was incubated in presence of HEPES 2x for 60 seconds before adding the  
426 total mixture drop by drop to the cells. Media was changed 10 hours after.

427 Transient transfection in MDCK cells was done with Lipofectamin 2000 reagent  
428 according to supplier's instructions (Thermo Fisher, Cat# 11668030).

429

#### 430 **PI3-kinase inhibitors**

431 For the colocalization experiments, cells ectopically expressing GFP-EEA1, were  
432 preincubated in the presence or in the absence of PI3K inhibitors 25  $\mu$ M LY294002 or

433 10  $\mu$ M wortmannin for 30 minutes, then Alexa548-transferrin or TMR-CPP were added  
434 to the cells for 5 minutes. Cells were washed on ice with RPMI, 10% FBS and  
435 incubated in same media in the presence of the inhibitors. Cells were visualized with  
436 LSM780 confocal microscope at the indicated time points. Colocalization between  
437 fluorescent cargo and EEA1 was visually quantitated. For western blotting experiments  
438 phosphorylated AKT was used as a proxy of PI3K activity. To stimulate  
439 phosphorylation, cells were incubated in serum-free medium for one hour. Medium was  
440 then changed to RPMI, 10% serum and cells were incubated for 20 minutes with 25  
441  $\mu$ M LY294002. Phosphorylated AKT was detected using rabbit anti-phosphoAKT  
442 antibody (Cell signaling, Cat# 92715).

443

#### 444 **Macropinocytosis inhibition**

445 Cells ectopically expressing GFP-EEA1 were starved overnight to stimulate  
446 macropinocytosis. Media was then changed to RPMI containing 10% FBS and cells  
447 were preincubated for 30 minutes with the indicated macropinocytosis inhibitors (kind  
448 gift from Dr. Stephan Kunz lab). Cells were pulsed for 5 minutes with TexasRed-  
449 dextran or TMR-TAT-RasGAP<sub>317-326</sub>, washed and visualized under confocal  
450 microscope in RPMI, 10% FBS in the presence of macropinocytosis inhibitors.

451

#### 452 **Plasmid constructs**

453 The RFP-hRab5A.dn3 (#921) plasmid encoding RFP-labeled version of human Rab5A  
454 protein was from Addgene (Cat# 14437). The mCh-hRab7A (#922) plasmid encoding  
455 mCherry-labeled version of human Rab7A protein was from Addgene (Cat# 61804).  
456 GFP-hRab5A.dn3 (#966), GFP-hRab7A.dn3 (#968), GFP-DynI.dn3 (#963) plasmid  
457 encoding GFP-labeled versions of the indicated human proteins, as well as dominant

458 negative isoforms of the following proteins GFP-hRab5A(S34N).dn3 (#961), GFP-  
459 Rab7A(T22N).dn3 (#969), GFP-Dynl(K44A).dn3 (#964) were a kind gift from Stefan  
460 Kunz laboratory. mCh-hRab5(S34N) (#933), plasmid encoding a mCherry-labeled  
461 dominant negative mutant version of human Rab5A was from Addgene (Cat# 35139).  
462 GFP-hRab5B.dn3 (#1008) plasmid encoding GFP-labeled wild-type version of human  
463 Rab5B isoform was from Addgene (Cat# 61802). GFP-hRab5B(S34N) (#1067)  
464 plasmid encoding GFP-labeled dominant negative mutant version of human Rab5B  
465 isoform was introduced to plasmid #1008 using Q5 Site-Directed Mutagenesis kit (NEB,  
466 Cat# E0554S) according to manufacturer's instructions using forward primer #1554  
467 (AGTGGGAAAGaacAGCCTGGTATTAC) and reverse primer #1555  
468 (GCAGATTCTCCCAGCAGG). GFP-Rab5C.dn3 (#1074) plasmid encoding GFP-  
469 labeled version of human Rab5C isoform was from Genescript (Cat# OHu09753C).  
470 CFP-hRab5C(S35N).dn3 (#1006) encoding Cerulean-labeled dominant negative  
471 mutant version of human Rab5C isoform was from Addgene (Cat# 11504). GFP-  
472 hEEA1 (#970) and hLamp1-GFP.dn3 (#971) encoding GFP-labeled version of human  
473 EEA1 and Lamp1, respectively were from Addgene (Cat# 42307 and 34831). BFP-  
474 EEA1 (#1009) plasmid was generated by subcloning GFP-hEEA1 (#970) into a BFP-  
475 hRab7A-Myc backbone (#1005, Addgene Cat# 79803) through ligation of both  
476 plasmids after digestion with BamHI (NEB, Cat# R313614) and BspEI (NEB, Cat#  
477 R0540S). hLamp1-BFP (#1016) plasmid encoding BFP-labeled version of human  
478 Lamp1 protein was from Addgene (Cat# 98828). GFP-hRab14.dn3 (#1017), GFP-  
479 hRab21.dn3 (#1023), GFP-hRab22.dn3 (#1018) and GFP-hRab31.dn3 (#1019)  
480 plasmids encoding GFP-labeled versions of the indicated human wild-type proteins  
481 were from Addgene (Cat# 49549, 83421, 49600 and 49610, respectively). GFP-  
482 hRab14(S25N).dn3 (#1037) and GFP-hRab14(N124I).dn3 (#1038) plasmids encoding

483 GFP-labeled versions of dominant negative Rab14 mutant were from Addgene (Cat#  
484 49594 and 49593). GFP-hRab21(T31N) (#1039) plasmid encoding GFP-labeled  
485 version of dominant negative Rab21 mutant was from Addgene (Cat# 83423). GFP-  
486 hRab22(S19N) (#1068) was generated using Q5 Site-Directed Mutagenesis kit (NEB,  
487 Cat# E0554S) according to manufacturer's instructions with forward primer #1556  
488 (TGTAGGTAAAaacAGTATTGTGTGGCGG) and reverse primer #1557  
489 (CCTGTATCCCCGAGCAGA) on plasmid #1018 that encodes the wild-type isoform of  
490 human Rab22 protein.

491

## 492 **Peptides**

493 TAT-RasGAP<sub>317-326</sub> is a retro-inverso peptide (i.e. synthesized with D-amino-acids in  
494 the opposite direction compared to the natural sequence) labeled or not with FITC or  
495 TMR. The TAT moiety corresponds to amino-acids 48–57 of the HIV TAT protein  
496 (RRRQRRKRG) and the RasGAP<sub>317-326</sub> moiety corresponds to amino-acids from 317  
497 to 326 of the human RasGAP protein (DTRLNTVMMW). These two moieties are  
498 separated by two glycine linker residues in the TAT-Ras-GAP<sub>317-326</sub> peptide. FITC- or  
499 TMR-bound peptides without cargo: TAT, MAP (KLALKLALKALKALKLA), Penetratin  
500 (RQIKWFQNRMRMKWKK), Transportan (GWTLNSAGYLLGKINLKALAALAKKIL), R9  
501 (RRRRRRRRR), were synthesized in retro-inverso conformation. FITC-labeled  
502 homeodomain: OTX2-HD (QRRERTTFTRAQLDVLEALFAKTRYPDIFMREEVALKINL  
503 PESRVQVWFKNRRRAKCRQQQ). All peptides were synthesized by SBS Genetech,  
504 China and resuspended to 1 mM in water.

505

## 506 **Polyamine labeling**

507 Spermine fluorescent labeling with CF405M or CF594 dyes was performed using a  
508 Mix-n-Stain Small Ligand Labeling Kit (Biotium, Cat# 92362 and 92352, respectively)  
509 according to manufacturer's instructions. The labeling efficiency was assessed by  
510 reverse-phase HPLC at Protein and Peptide Chemistry Facility at University of  
511 Lausanne.

512

### 513 **Statistical analysis**

514 Statistical analysis was performed on non-normalized data, using GraphPad Prism 7.  
515 All measurements were from biological replicates. Unless otherwise stated, the vertical  
516 bars in the graph represent the standard deviation of mean from at least three  
517 independent experiments.

518

### 519 **Data availability**

520 Image randomization script can be found at: [https://github.com/BICC-UNIL-](https://github.com/BICC-UNIL-EPFL/randomizer)  
521 [EPFL/randomizer](https://github.com/BICC-UNIL-EPFL/randomizer).

522

## 523 **Figure legends**

524

### 525 **Figure 1. CPPs follow a Rab5-independent endocytic pathway.**

526 **(A-D)** HeLa KCNN4 knock-out cells ectopically expressing the fluorescently-tagged  
527 early (Rab5A, Rab5B and EEA1) or late (Rab7 and Lamp1) endosomal markers were  
528 incubated with 20  $\mu\text{g/ml}$  transferrin, 0.2 mg/ml dextran 10 kDa, 2  $\mu\text{g/ml}$  EGF or with 40  
529  $\mu\text{M}$  of CPPs linked or not to a cargo for 5 minutes, then washed and imaged at the  
530 indicated time points by confocal microscopy (see Figure S1B for experimental setup).  
531 All experiments were performed on live cells at 37°C unless indicated otherwise.

532 **(A)** Representative confocal images of HeLa KCNN4 knock-out cells, expressing GFP-  
533 tagged endosomal markers, incubated with AlexaFluor568-transferrin or TMR-TAT.  
534 Images were acquired at 5 or 30 minutes after the addition of endosomal material.  
535 Scale bar: 10  $\mu\text{m}$ .

536 **(B-C)** Quantitation of colocalization between the indicated fluorescent material and  
537 fluorescently-tagged early and late endosomal markers. Colocalization analysis was  
538 performed as described in Methods and Figure S1A. The data correspond to mean  $\pm$   
539 SD of three independent experiments. In panel B, the data obtained with R9 are shown,  
540 for comparison, both on the top graphs and the bottom graphs. In panel C, cells were  
541 incubated at 20°C to delay endosomal maturation.

542 **(D)** Representative confocal, Airyscan acquired, high-resolution images of cells  
543 ectopically expressing GFP-EEA1 incubated with 40  $\mu\text{M}$  TMR-TAT for 5 minutes. Scale  
544 bar: 2  $\mu\text{m}$ .

545

### 546 **Figure 2. CPP endocytosis does not require PI(3)P-kinase-like enzymes.**

547 **(A)** Colocalization quantitation between the indicated endosomal material and  
548 endosomal markers in the presence or in the absence of LY294002, a pan-PI3-kinase  
549 inhibitor. HeLa KCNN4 knock-out cells, ectopically expressing GFP-tagged EEA1 or  
550 Lamp1, were incubated with 20  $\mu\text{g/ml}$  AlexaFluor568-Transferrin, 0.2 mg/ml TMR-  
551 Dextran 10 kDa or 40  $\mu\text{M}$  TMR-R9 for a pulse of 5 minutes. Cells were preincubated  
552 or not for 30 minutes with 25  $\mu\text{M}$  LY294002, which was still present during the full  
553 duration of the experiment. The data correspond to mean  $\pm$  SD of three independent  
554 experiments. The p-values were calculated based on area under the curve (AUC)  
555 analysis followed by a t-test.

556 **(B)** Quantitation of the number of endosomal vesicles per cell in the presence or in the  
557 absence of wortmannin, a pan-PI3-kinase inhibitor. HeLa KCNN4 knock-out cells were  
558 incubated with 20  $\mu\text{g/ml}$  AlexaFluor568-Transferrin, 0.2 mg/ml TMR-Dextran 10 kDa  
559 or 40  $\mu\text{M}$  TMR-CPP for a pulse of 5 minutes. Cells were preincubated or not for 30  
560 minutes with 10  $\mu\text{M}$  wortmannin, which was still present during the full duration of the  
561 experiment. The number of vesicles positive for the indicated endosomal material were  
562 visually calculated based on confocal images, acquired in the middle of the cell. A  
563 minimum of 150 cells were quantitated per condition. The results correspond to three  
564 independent experiments. The p-values were calculated using paired t-test.

565

### 566 **Figure 3. CPP endosomal maturation is Rab14-dependent.**

567 Quantitation of colocalization between TMR-TAT and GFP-EEA1 (15 minutes, top) or  
568 Lamp1-GFP (30 minutes, bottom) in a pulse chase experiment in MDCK-II wild-type  
569 cells and the indicated Rab knock-outs. A minimum of 50 cells were quantitated per  
570 condition. Statistical analysis was performed with ANOVA multiple comparison to wild-  
571 type condition with Dunnett's correction. Only significant p-values are shown on the  
572 Figure. Rab5-degron cells were treated with 1  $\mu\text{g/ml}$  doxycycline and 500  $\mu\text{M}$  IAA for  
573 48 hours to induce degradation of degron-tagged Rab5A in the Rab5B/C knockout cell  
574 line.

575

### 576 **Figure 4. HDs and polyamines are following a Rab5-independent, Rab14- 577 dependent endocytic route.**

578 **(A)** Colocalization quantitation between endosomal markers and HD or polyamine.  
579 HeLa KCNN4 knock-out cells, ectopically expressing the indicated endosomal  
580 markers, were subjected to a 5-minute pulse incubation with fluorescently labelled  
581 OTX2 HD (10  $\mu\text{M}$ ) or spermine (5  $\mu\text{M}$ ). Quantitation assessment was based on  
582 confocal images. The results correspond to mean  $\pm$  SD of three independent  
583 experiments.

584 **(B)** Colocalization quantitation between fluorescent versions of OTX2-HD (10  $\mu\text{M}$ ) or  
585 spermine (5  $\mu\text{M}$ ) with EEA1 (top) or Lamp1 (bottom) in MDCK-II wild-type and the  
586 indicated Rab knockouts. Cells were incubated for 5 minutes, then washed and  
587 confocal images were acquired at 15- and 30-minutes post incubation for early and  
588 late endosomal markers, respectively. A minimum of 50 cells were quantitated per



589 condition. Statistical analysis was performed with ANOVA multiple comparison to wild-  
590 type condition with Dunett's correction.

591

592 **Figure S1. Colocalization quantitation and experimental setup.**

593 **(A)** Colocalization quantitation between fluorescently labeled endosomal material and  
594 endocytic markers. Left: representative confocal images of HeLa KCNN4 knock-out  
595 cells expressing GFP-Rab5A, in the presence of 20 ug/ml AlexaFluor568-Transferrin  
596 for 5 minutes. Colocalization assessment between endocytosed material and a given  
597 endosomal marker was performed on confocal images by visual assessment,  
598 switching back and forth between the color channels. The samples were randomized  
599 to blind the experimentators from the nature of the samples they were analyzing. The  
600 images shown on the left are cropped regions of cell transfected with GFP-Rab5 and  
601 incubated with AlexaFluor568-transferrin. The circles numbered 1 to 5 depict examples  
602 of colocalization versus non-colocalization between Rab5 and transferrin. Scale bar:  
603 10  $\mu\text{m}$ . Graphs on the right-hand side: our visual quantitation (mean  $\pm$  SD of three  
604 independent experiments performed on 165 cells per condition) was validated by  
605 Mander's coefficient calculation performed on the same samples using the JaCoP  
606 plugin in ImageJ (shown as box plots).

607 **(B)** Scheme of the pulse chase experiments used in the experiments depicted in the  
608 figures. Cells were incubated five minutes with various fluorescent material, washed,  
609 and the endosomal maturation followed overtime.

610 **(C)** Ectopic expression does not alter the subcellular location of endosomal markers.  
611 Ectopic (top row) and endogenous (bottom row) location of EEA1 and Lamp1. Scale  
612 bar: 10  $\mu\text{m}$ .

613 **(D)** Quantitation of the colocalization between ectopic or endogenous EEA1 or Lamp1  
614 with Alexa568-transferrin in live or fixed KCNN4 knock-out HeLa cells. The data  
615 correspond to mean  $\pm$  SD of three independent experiments. The p-values were  
616 calculated using ANOVA analysis with Dunett's correction based on AUC values from  
617 fixed samples compared to live samples.

618 **(E)** Colocalization quantitation of the indicated FITC-CPPs with TMR-R9. The data  
619 correspond to the mean  $\pm$  SD of three independent experiments.

620 **(F)** Colocalization between TAT-RasGAP<sub>317-326</sub> (40  $\mu\text{M}$ ) and GFP-tagged Rab5, EEA1  
621 or Rab7 in HeLa KCNN4 knock-out cell line. Cells were incubated in the continuous

622 presence of TAT-RasGAP<sub>317-326</sub>. The data correspond to mean  $\pm$  SD of three  
623 independent experiments.

624 **(G)** Colocalization between transferrin and Rab5 (top) or Rab7 (bottom) in the  
625 presence or in the absence of 40  $\mu$ M TAT-RasGAP<sub>317-326</sub>. The data correspond to  
626 mean  $\pm$  SD of three independent experiments. The p-values were calculated based on  
627 AUC analysis.

628 **(H)** Colocalization quantitation between ectopically expressed BFP-EEA1 and Lamp1-  
629 GFP in the presence or in the absence of 40  $\mu$ M TAT-RasGAP<sub>317-326</sub>. The data  
630 correspond to mean  $\pm$  SD of three independent experiments.

631

### 632 **Figure S2. Endosomal vesicle formation inhibitors do not affect CPP uptake.**

633 **(A)** Representative confocal images of HeLa KCNN4 knock-out cells preincubated or  
634 not with the indicated inhibitors for 30 minutes prior to the addition of 0.2 mg/ml TMR-  
635 Dextran 10 kDa or 40  $\mu$ M TMR-TAT-RasGAP<sub>317-326</sub> for a 5-minute pulse. Confocal  
636 images were acquired at 5, 30 and 60 minutes after the addition of endosomal material.  
637 The inhibitors were present throughout the full duration of the experiment.

638 **(B)** Total cell fluorescence quantitation based on images acquired in panel A. Results  
639 correspond to mean  $\pm$  SD of three independent experiments (n>150 cells per  
640 condition).

641 **(C)** Representative confocal images of HeLa KCNN4 knock-out cells ectopically  
642 expressing wild-type (Dyml WT) or dominant negative (Dyml K44A) version of dynamin  
643 I. Cells were incubated with 20  $\mu$ g/ml AlexaFluor568-transferrin or 40  $\mu$ M TAT-  
644 RasGAP<sub>317-326</sub>. Cell nuclei were labeled with live Hoechst. White arrows point to cells  
645 positively transfected with GFP-dynamin constructs and yellow arrows indicate non-  
646 transfected cells. Images were acquired at 15 minutes post incubation with the cargos.

647 **(D)** Left panel: red Ponceau S stained membrane, right panel: phospho-AKT antibody  
648 signal detection. HeLa KCNN4 knock-out cells incubated in the presence or in the  
649 absence of 25  $\mu$ M pan-PI3-kinase inhibitor, LY294002. To stimulate AKT  
650 phosphorylation cells were preincubated in a serum-free media for one hour.  
651 Phosphorylated AKT was used as a proxy for PI3-kinase activity.

652

### 653 **Figure S3. CPP endocytosis is Rab5-independent.**

654 **(A)** Western blot-mediated Rab5 detection in MDCK-II wild-type or Rab5-degron cell  
655 lysates incubated in the presence of 1  $\mu\text{g/ml}$  doxycycline and 500  $\mu\text{M}$  IAA for the  
656 indicated periods of time to induce degradation of Rab5A.

657 **(B)** Colocalization of TAT-containing vesicles with the indicated endosomal markers.  
658 MDCK-II wild-type cells were incubated with 40  $\mu\text{M}$  TMR-TAT for 5-minute pulse.

659 **(C)** Representative confocal images of cells analyzed in panel D-E in HeLa KCNN4  
660 knockout cells.

661 **(D-E)** Colocalization quantitation of transferrin, dextran, and the indicated CPP with  
662 EEA1 (panel D) or Lamp1 (panel E) in cells transfected with the indicated Rab5  
663 dominant negative constructs in HeLa KCNN4 knockout cells in a pulse experiment  
664 setting (see Figure S1B). The data correspond to mean  $\pm$  SD of three independent  
665 experiments. Statistical analysis was performed using two-tailed t-test based on AUC  
666 values. The p-values correspond to the comparison between the cells within the same  
667 population transfected or not with the dominant negative constructs.

668

#### 669 **Figure S4. Limited colocalization between Rab14 and Lamp1.**

670 **(A)** Representative confocal images of HeLa KCNN4 knockout cells ectopically  
671 expressing GFP-Rab14 and Lamp1-BFP that were incubated for 5 minutes with 20  
672  $\mu\text{g/ml}$  AlexaFluor647-Transferrin or 40  $\mu\text{M}$  TMR-TAT. Images were acquired at 30  
673 minutes post-incubation with endosomal cargo. Scale bar: 10  $\mu\text{m}$ .

674 **(B)** Colocalization quantitation of Rab14 with Lamp1 from the experiment in panel A.  
675 A minimum of 50 cells were quantitated per condition.

676

#### 677 **Figure S5. Rab14 dominant negative mutants block the maturation of CPP-** 678 **containing endosomes.**

679 **(A)** Colocalization quantitation between the indicated endocytosed material and the  
680 indicated GFP-labeled Rab proteins ectopically expressed in HeLa KCNN4 knockout  
681 cells. The results correspond to mean  $\pm$  SD of three independent experiments.

682 **(B)** Colocalization quantitation between the indicated endocytosed material and EEA1  
683 in cells transfected with Rab14, Rab21 or Rab22 dominant negative constructs. The  
684 data correspond to the mean  $\pm$  SD of three independent experiments. Statistical  
685 analysis was performed using ANOVA test with Dunnett's correction, based on AUC

686 values. The p-values correspond to the comparison between the cells within the same  
687 population transfected or not with the dominant negative constructs.

688

689 **Figure S6. Spermine follows a Rab5-independent, Rab14-dependent endosomal**  
690 **maturation.**

691 **(A)** Colocalization between 5  $\mu$ M spermine with EEA1 (top) or Lamp1 (bottom) in the  
692 Rab5A dominant negative background. HeLa KCNN4 knockout cells were incubated  
693 for 5-minute pulse with endosomal cargo. The results correspond to mean  $\pm$  SD of  
694 three independent experiments. Statistical analysis was performed using two-tailed t-  
695 test based on AUC values. The p-values correspond to the comparison between the  
696 cells within the same population transfected or not with the dominant negative  
697 constructs.

698 **(B)** Colocalization between 5  $\mu$ M spermine with EEA1 (top) or Lamp1 (bottom) in HeLa  
699 KCNN4 knockout cells expressing Rab14 dominant negative mutants. The cells were  
700 exposed to the cargos during a 5-minute pulse. The results correspond to mean  $\pm$  SD  
701 of three independent experiments. Statistical analysis was performed using ANOVA  
702 test with Dunnett's correction, based on AUC values. The p-values correspond to the  
703 comparison between the cells within the same population transfected or not with the  
704 dominant negative constructs.

705

706

707

## 708 References

- 709 1 Johannes, L., Parton, R. G., Bassereau, P. & Mayor, S. Building endocytic pits without clathrin.  
710 *Nat Rev Mol Cell Biol* **16**, 311-321, doi:10.1038/nrm3968 (2015).
- 711 2 Mercer, J., Schelhaas, M. & Helenius, A. Virus entry by endocytosis. *Annu Rev Biochem* **79**,  
712 803-833, doi:10.1146/annurev-biochem-060208-104626 (2010).
- 713 3 Kaksonen, M. & Roux, A. Mechanisms of clathrin-mediated endocytosis. *Nat Rev Mol Cell Biol*  
714 **19**, 313-326, doi:10.1038/nrm.2017.132 (2018).
- 715 4 Schmid, S. L., Sorkin, A. & Zerial, M. Endocytosis: Past, present, and future. *Cold Spring Harb*  
716 *Perspect Biol* **6**, a022509, doi:10.1101/cshperspect.a022509 (2014).
- 717 5 Thottacherry, J. J., Sathe, M., Prabhakara, C. & Mayor, S. Spoiled for Choice: Diverse  
718 Endocytic Pathways Function at the Cell Surface. *Annu Rev Cell Dev Biol* **35**, 55-84,  
719 doi:10.1146/annurev-cellbio-100617-062710 (2019).
- 720 6 Takei, K. & Haucke, V. Clathrin-mediated endocytosis: membrane factors pull the trigger.  
721 *Trends Cell Biol* **11**, 385-391, doi:10.1016/s0962-8924(01)02082-7 (2001).
- 722 7 Cocucci, E., Aguet, F., Boulant, S. & Kirchhausen, T. The first five seconds in the life of a  
723 clathrin-coated pit. *Cell* **150**, 495-507, doi:10.1016/j.cell.2012.05.047 (2012).
- 724 8 Chen, Z. & Schmid, S. L. Evolving models for assembling and shaping clathrin-coated pits. *J*  
725 *Cell Biol* **219**, doi:10.1083/jcb.202005126 (2020).
- 726 9 Gautreau, A., Oguievetskaia, K. & Ungermann, C. Function and regulation of the endosomal  
727 fusion and fission machineries. *Cold Spring Harb Perspect Biol* **6**,  
728 doi:10.1101/cshperspect.a016832 (2014).
- 729 10 Scott, C. C., Vacca, F. & Gruenberg, J. Endosome maturation, transport and functions. *Semin*  
730 *Cell Dev Biol* **31**, 2-10, doi:10.1016/j.semcdb.2014.03.034 (2014).
- 731 11 Huotari, J. & Helenius, A. Endosome maturation. *EMBO J* **30**, 3481-3500,  
732 doi:10.1038/emboj.2011.286 (2011).
- 733 12 Naslavsky, N. & Caplan, S. The enigmatic endosome - sorting the ins and outs of endocytic  
734 trafficking. *J Cell Sci* **131**, doi:10.1242/jcs.216499 (2018).
- 735 13 Murray, D. H., Jahnel, M., Lauer, J., Avellaneda, M. J., Brouilly, N., Cezanne, A., Morales-  
736 Navarrete, H., Perini, E. D., Ferguson, C., Lupas, A. N., Kalaidzidis, Y., Parton, R. G., Grill, S. W.  
737 & Zerial, M. An endosomal tether undergoes an entropic collapse to bring vesicles together.  
738 *Nature* **537**, 107-111, doi:10.1038/nature19326 (2016).
- 739 14 Jaber, N., Mohd-Naim, N., Wang, Z., DeLeon, J. L., Kim, S., Zhong, H., Sheshadri, N., Dou, Z.,  
740 Edinger, A. L., Du, G., Braga, V. M. & Zong, W. X. Vps34 regulates Rab7 and late endocytic  
741 trafficking through recruitment of the GTPase-activating protein Armus. *J Cell Sci* **129**, 4424-  
742 4435, doi:10.1242/jcs.192260 (2016).
- 743 15 Langemeyer, L., Frohlich, F. & Ungermann, C. Rab GTPase Function in Endosome and  
744 Lysosome Biogenesis. *Trends Cell Biol* **28**, 957-970, doi:10.1016/j.tcb.2018.06.007 (2018).
- 745 16 Guidotti, G., Brambilla, L. & Rossi, D. Cell-Penetrating Peptides: From Basic Research to  
746 Clinics. *Trends Pharmacol Sci* **38**, 406-424, doi:10.1016/j.tips.2017.01.003 (2017).
- 747 17 Vasconcelos, L., Parn, K. & Langel, U. Therapeutic potential of cell-penetrating peptides. *Ther*  
748 *Deliv* **4**, 573-591, doi:10.4155/tde.13.22 (2013).
- 749 18 Bechara, C. & Sagan, S. Cell-penetrating peptides: 20 years later, where do we stand? *FEBS*  
750 *Lett* **587**, 1693-1702, doi:10.1016/j.febslet.2013.04.031 (2013).
- 751 19 Trabulo, S., Cardoso, A. L., Mano, M. & De Lima, M. C. Cell-Penetrating Peptides-Mechanisms  
752 of Cellular Uptake and Generation of Delivery Systems. *Pharmaceuticals (Basel)* **3**, 961-993,  
753 doi:10.3390/ph3040961 (2010).
- 754 20 Futaki, S., Hirose, H. & Nakase, I. Arginine-rich peptides: methods of translocation through  
755 biological membranes. *Curr Pharm Des* **19**, 2863-2868 (2013).
- 756 21 Jones, A. T. & Sayers, E. J. Cell entry of cell penetrating peptides: tales of tails wagging dogs. *J*  
757 *Control Release* **161**, 582-591, doi:10.1016/j.jconrel.2012.04.003 (2012).

- 758 22 Madani, F., Lindberg, S., Langel, U., Futaki, S. & Graslund, A. Mechanisms of cellular uptake of  
759 cell-penetrating peptides. *J Biophys* **2011**, 414729, doi:10.1155/2011/414729 (2011).
- 760 23 Koren, E. & Torchilin, V. P. Cell-penetrating peptides: breaking through to the other side.  
761 *Trends Mol Med* **18**, 385-393, doi:10.1016/j.molmed.2012.04.012 (2012).
- 762 24 Illien, F., Rodriguez, N., Amoura, M., Joliot, A., Pallerla, M., Cribier, S., Burlina, F. & Sagan, S.  
763 Quantitative fluorescence spectroscopy and flow cytometry analyses of cell-penetrating  
764 peptides internalization pathways: optimization, pitfalls, comparison with mass spectrometry  
765 quantification. *Sci Rep* **6**, 36938, doi:10.1038/srep36938 (2016).
- 766 25 Mueller, J., Kretschmar, I., Volkmer, R. & Boisguerin, P. Comparison of cellular uptake using  
767 22 CPPs in 4 different cell lines. *Bioconjug Chem* **19**, 2363-2374, doi:10.1021/bc800194e  
768 (2008).
- 769 26 Xie, J., Bi, Y., Zhang, H., Dong, S., Teng, L., Lee, R. J. & Yang, Z. Cell-Penetrating Peptides in  
770 Diagnosis and Treatment of Human Diseases: From Preclinical Research to Clinical  
771 Application. *Front Pharmacol* **11**, 697, doi:10.3389/fphar.2020.00697 (2020).
- 772 27 Ruseska, I. & Zimmer, A. Internalization mechanisms of cell-penetrating peptides. *Beilstein J*  
773 *Nanotechnol* **11**, 101-123, doi:10.3762/bjnano.11.10 (2020).
- 774 28 Kristensen, M., Birch, D. & Morck Nielsen, H. Applications and Challenges for Use of Cell-  
775 Penetrating Peptides as Delivery Vectors for Peptide and Protein Cargos. *Int J Mol Sci* **17**,  
776 doi:10.3390/ijms17020185 (2016).
- 777 29 Raagel, H., Saalik, P. & Pooga, M. Peptide-mediated protein delivery-which pathways are  
778 penetrable? *Biochim Biophys Acta* **1798**, 2240-2248, doi:10.1016/j.bbamem.2010.02.013  
779 (2010).
- 780 30 Cleal, K., He, L., Watson, P. D. & Jones, A. T. Endocytosis, intracellular traffic and fate of cell  
781 penetrating peptide based conjugates and nanoparticles. *Curr Pharm Des* **19**, 2878-2894,  
782 doi:10.2174/13816128113199990297 (2013).
- 783 31 Futaki, S. & Nakase, I. Cell-Surface Interactions on Arginine-Rich Cell-Penetrating Peptides  
784 Allow for Multiplex Modes of Internalization. *Acc Chem Res* **50**, 2449-2456,  
785 doi:10.1021/acs.accounts.7b00221 (2017).
- 786 32 Trofimenko, E., Grasso, G., Heulot, M., Chevalier, N., Deriu, M. A., Dubuis, G., Arribat, Y.,  
787 Serulla, M., Michel, S., Vantomme, G., Ory, F., Dam, L. C., Puyal, J., Amati, F., Lüthi, A.,  
788 Danani, A. & Widmann, C. Genetic, cellular and structural characterization of the membrane  
789 potential-dependent cell-penetrating peptide translocation pore. *bioRxiv*,  
790 2020.2002.2025.963017, doi:10.1101/2020.02.25.963017 (2021).
- 791 33 Torriani, G., Trofimenko, E., Mayor, J., Fedeli, C., Moreno, H., Michel, S., Heulot, M.,  
792 Chevalier, N., Zimmer, G., Shrestha, N., Plattet, P., Engler, O., Rothenberger, S., Widmann, C.  
793 & Kunz, S. Identification of clotrimazole-derivatives as specific inhibitors of Arenavirus fusion.  
794 *J Virol*, doi:10.1128/JVI.01744-18 (2019).
- 795 34 Annibaldi, A., Dousse, A., Martin, S., Tazi, J. & Widmann, C. Revisiting G3BP1 as a RasGAP  
796 Binding Protein: Sensitization of Tumor Cells to Chemotherapy by the RasGAP 317-326  
797 Sequence Does Not Involve G3BP1. *PLoS One* **6**, doi:ARTN e29024  
798 DOI 10.1371/journal.pone.0029024 (2011).
- 799 35 Barras, D., Lorusso, G., Lhermitte, B., Viertl, D., Ruegg, C. & Widmann, C. Fragment N2, a  
800 caspase-3-generated RasGAP fragment, inhibits breast cancer metastatic progression. *Int J*  
801 *Cancer* **135**, 242-247, doi:10.1002/ijc.28674 (2014).
- 802 36 Barras, D., Lorusso, G., Ruegg, C. & Widmann, C. Inhibition of cell migration and invasion  
803 mediated by the TAT-RasGAP317-326 peptide requires the DLC1 tumor suppressor.  
804 *Oncogene* **33**, 5163-5172, doi:10.1038/onc.2013.465 (2014).
- 805 37 Chevalier, N., Gross, N. & Widmann, C. Assessment of the chemosensitizing activity of TAT-  
806 RasGAP317-326 in childhood cancers. *PLoS One* **10**, e0120487,  
807 doi:10.1371/journal.pone.0120487 (2015).

- 808 38 Heulot, M., Chevalier, N., Puyal, J., Margue, C., Michel, S., Kreis, S., Kulms, D., Barras, D.,  
809 Nahimana, A. & Widmann, C. The TAT-RasGAP317-326 anti-cancer peptide can kill in a  
810 caspase-, apoptosis-, and necroptosis-independent manner. *Oncotarget* **7**, 64342-64359,  
811 doi:10.18632/oncotarget.11841 (2016).
- 812 39 Heulot, M., Jacquier, N., Aeby, S., Le Roy, D., Roger, T., Trofimenko, E., Barras, D., Greub, G. &  
813 Widmann, C. The Anticancer Peptide TAT-RasGAP317-326 Exerts Broad Antimicrobial  
814 Activity. *Front Microbiol* **8**, 994, doi:10.3389/fmicb.2017.00994 (2017).
- 815 40 Michod, D., Annibaldi, A., Schaefer, S., Dapples, C., Rochat, B. & Widmann, C. Effect of  
816 RasGAP N2 fragment-derived peptide on tumor growth in mice. *J Natl Cancer Inst* **101**, 828-  
817 832, doi:10.1093/jnci/djp100 (2009).
- 818 41 Michod, D., Yang, J. Y., Chen, J., Bonny, C. & Widmann, C. A RasGAP-derived cell permeable  
819 peptide potently enhances genotoxin-induced cytotoxicity in tumor cells. *Oncogene* **23**,  
820 8971-8978, doi:10.1038/sj.onc.1207999 (2004).
- 821 42 Pittet, O., Petermann, D., Michod, D., Krueger, T., Cheng, C., Ris, H. B. & Widmann, C. Effect  
822 of the TAT-RasGAP(317-326) peptide on apoptosis of human malignant mesothelioma cells  
823 and fibroblasts exposed to meso-tetra-hydroxyphenyl-chlorin and light. *J Photochem*  
824 *Photobiol B* **88**, 29-35, doi:10.1016/j.jphotobiol.2007.04.009 (2007).
- 825 43 Tsoutsou, P., Annibaldi, A., Viertl, D., Ollivier, J., Buchegger, F., Vozenin, M. C., Bourhis, J.,  
826 Widmann, C. & Matzinger, O. TAT-RasGAP317-326 Enhances Radiosensitivity of Human  
827 Carcinoma Cell Lines In Vitro and In Vivo through Promotion of Delayed Mitotic Cell Death.  
828 *Radiat Res* **187**, 562-569, doi:10.1667/RR14509.1 (2017).
- 829 44 Serulla, M., Ichim, G., Stojceski, F., Grasso, G., Afonin, S., Heulot, M., Schober, T., Roth, R.,  
830 Godefroy, C., Milhiet, P. E., Das, K., Garcia-Saez, A. J., Danani, A. & Widmann, C. TAT-  
831 RasGAP317-326 kills cells by targeting inner-leaflet-enriched phospholipids. *Proc Natl Acad*  
832 *Sci U S A*, doi:10.1073/pnas.2014108117 (2020).
- 833 45 Deshayes, S., Konate, K., Dussot, M., Chavey, B., Vaissiere, A., Van, T. N. N., Aldrian, G.,  
834 Padari, K., Pooga, M., Vives, E. & Boisguerin, P. Deciphering the internalization mechanism of  
835 WRAP:siRNA nanoparticles. *Biochim Biophys Acta Biomembr* **1862**, 183252,  
836 doi:10.1016/j.bbamem.2020.183252 (2020).
- 837 46 Appelbaum, J. S., LaRoche, J. R., Smith, B. A., Balkin, D. M., Holub, J. M. & Schepartz, A.  
838 Arginine topology controls escape of minimally cationic proteins from early endosomes to  
839 the cytoplasm. *Chem Biol* **19**, 819-830, doi:10.1016/j.chembiol.2012.05.022 (2012).
- 840 47 Koivusalo, M., Welch, C., Hayashi, H., Scott, C. C., Kim, M., Alexander, T., Touret, N., Hahn, K.  
841 M. & Grinstein, S. Amiloride inhibits macropinocytosis by lowering submembranous pH and  
842 preventing Rac1 and Cdc42 signaling. *J Cell Biol* **188**, 547-563, doi:10.1083/jcb.200908086  
843 (2010).
- 844 48 Viaud, J. & Peterson, J. R. An allosteric kinase inhibitor binds the p21-activated kinase  
845 autoregulatory domain covalently. *Mol Cancer Ther* **8**, 2559-2565, doi:10.1158/1535-  
846 7163.MCT-09-0102 (2009).
- 847 49 Dharmawardhane, S., Schurmann, A., Sells, M. A., Chernoff, J., Schmid, S. L. & Bokoch, G. M.  
848 Regulation of macropinocytosis by p21-activated kinase-1. *Mol Biol Cell* **11**, 3341-3352,  
849 doi:10.1091/mbc.11.10.3341 (2000).
- 850 50 McLAUCHLAN, H., ELLIOTT, M. & COHEN, P. The specificities of protein kinase inhibitors: an  
851 update. *Biochemical Journal* **371**, 199-204, doi:10.1042/bj20021535 (2003).
- 852 51 Araki, N., Hatae, T., Furukawa, A. & Swanson, J. A. Phosphoinositide-3-kinase-independent  
853 contractile activities associated with Fcγ-receptor-mediated phagocytosis and  
854 macropinocytosis in macrophages. *Journal of Cell Science* **116**, 247-257,  
855 doi:10.1242/jcs.00235 (2003).
- 856 52 Bubb, M. R., Senderowicz, A. M., Sausville, E. A., Duncan, K. L. & Korn, E. D. Jasplakinolide, a  
857 cytotoxic natural product, induces actin polymerization and competitively inhibits the  
858 binding of phalloidin to F-actin. *J Biol Chem* **269**, 14869-14871 (1994).

- 859 53 Sampath, P. & Pollard, T. D. Effects of cytochalasin, phalloidin, and pH on the elongation of  
860 actin filaments. *Biochemistry* **30**, 1973-1980 (1991).
- 861 54 Fujimoto, L. M., Roth, R., Heuser, J. E. & Schmid, S. L. Actin Assembly Plays a Variable, but not  
862 Obligatory Role in Receptor-Mediated Endocytosis. *Traffic* **1**, 161-171, doi:10.1034/j.1600-  
863 0854.2000.010208.x (2000).
- 864 55 Wenk, M. R. & De Camilli, P. Protein-lipid interactions and phosphoinositide metabolism in  
865 membrane traffic: insights from vesicle recycling in nerve terminals. *Proc Natl Acad Sci U S A*  
866 **101**, 8262-8269, doi:10.1073/pnas.0401874101 (2004).
- 867 56 Campa, C. C., Franco, I. & Hirsch, E. PI3K-C2alpha: One enzyme for two products coupling  
868 vesicle trafficking and signal transduction. *FEBS Lett* **589**, 1552-1558,  
869 doi:10.1016/j.febslet.2015.05.001 (2015).
- 870 57 Bissig, C., Johnson, S. & Gruenberg, J. Studying lipids involved in the endosomal pathway.  
871 *Methods Cell Biol* **108**, 19-46, doi:10.1016/B978-0-12-386487-1.00002-X (2012).
- 872 58 Miaczynska, M. & Zerial, M. Mosaic organization of the endocytic pathway. *Exp Cell Res* **272**,  
873 8-14, doi:10.1006/excr.2001.5401 (2002).
- 874 59 Ramadani, F., Bolland, D. J., Garcon, F., Emery, J. L., Vanhaesebroeck, B., Corcoran, A. E. &  
875 Okkenhaug, K. The PI3K isoforms p110alpha and p110delta are essential for pre-B cell  
876 receptor signaling and B cell development. *Sci Signal* **3**, ra60, doi:10.1126/scisignal.2001104  
877 (2010).
- 878 60 Simonsen, A., Lippe, R., Christoforidis, S., Gaullier, J. M., Brech, A., Callaghan, J., Toh, B. H.,  
879 Murphy, C., Zerial, M. & Stenmark, H. EEA1 links PI(3)K function to Rab5 regulation of  
880 endosome fusion. *Nature* **394**, 494-498, doi:10.1038/28879 (1998).
- 881 61 McBride, H. M., Rybin, V., Murphy, C., Giner, A., Teasdale, R. & Zerial, M. Oligomeric  
882 complexes link Rab5 effectors with NSF and drive membrane fusion via interactions between  
883 EEA1 and syntaxin 13. *Cell* **98**, 377-386 (1999).
- 884 62 Zeigerer, A., Gilleron, J., Bogorad, R. L., Marsico, G., Nonaka, H., Seifert, S., Epstein-Barash,  
885 H., Kuchimanchi, S., Peng, C. G., Ruda, V. M., Del Conte-Zerial, P., Hengstler, J. G., Kalaidzidis,  
886 Y., Koteliansky, V. & Zerial, M. Rab5 is necessary for the biogenesis of the endolysosomal  
887 system in vivo. *Nature* **485**, 465-470, doi:10.1038/nature11133 (2012).
- 888 63 Fili, N., Calleja, V., Woscholski, R., Parker, P. J. & Larijani, B. Compartmental signal  
889 modulation: Endosomal phosphatidylinositol 3-phosphate controls endosome morphology  
890 and selective cargo sorting. *Proc Natl Acad Sci U S A* **103**, 15473-15478,  
891 doi:10.1073/pnas.0607040103 (2006).
- 892 64 Posor, Y., Eichhorn-Gruenig, M., Puchkov, D., Schoneberg, J., Ullrich, A., Lampe, A., Muller, R.,  
893 Zerbakhsh, S., Gulluni, F., Hirsch, E., Krauss, M., Schultz, C., Schmoranzer, J., Noe, F. &  
894 Haucke, V. Spatiotemporal control of endocytosis by phosphatidylinositol-3,4-bisphosphate.  
895 *Nature* **499**, 233-237, doi:10.1038/nature12360 (2013).
- 896 65 Hasegawa, J., Tokuda, E., Tenno, T., Tsujita, K., Sawai, H., Hiroaki, H., Takenawa, T. & Itoh, T.  
897 SH3YL1 regulates dorsal ruffle formation by a novel phosphoinositide-binding domain. *J Cell*  
898 *Biol* **193**, 901-916, doi:10.1083/jcb.201012161 (2011).
- 899 66 Maekawa, M., Terasaka, S., Mochizuki, Y., Kawai, K., Ikeda, Y., Araki, N., Skolnik, E. Y.,  
900 Taguchi, T. & Arai, H. Sequential breakdown of 3-phosphorylated phosphoinositides is  
901 essential for the completion of macropinocytosis. *Proc Natl Acad Sci U S A* **111**, E978-987,  
902 doi:10.1073/pnas.1311029111 (2014).
- 903 67 Balla, A. & Balla, T. Phosphatidylinositol 4-kinases: old enzymes with emerging functions.  
904 *Trends Cell Biol* **16**, 351-361, doi:10.1016/j.tcb.2006.05.003 (2006).
- 905 68 Santos Mde, S., Naal, R. M., Baird, B. & Holowka, D. Inhibitors of PI(4,5)P2 synthesis reveal  
906 dynamic regulation of IgE receptor signaling by phosphoinositides in RBL mast cells. *Mol*  
907 *Pharmacol* **83**, 793-804, doi:10.1124/mol.112.082834 (2013).
- 908 69 Naguib, A. Following the trail of lipids: Signals initiated by PI3K function at multiple cellular  
909 membranes. *Sci Signal* **9**, re4, doi:10.1126/scisignal.aad7885 (2016).



- 910 70 Zhang, S. X., Duan, L. H., He, S. J., Zhuang, G. F. & Yu, X. Phosphatidylinositol 3,4-  
911 bisphosphate regulates neurite initiation and dendrite morphogenesis via actin aggregation.  
912 *Cell Res* **27**, 253-273, doi:10.1038/cr.2017.13 (2017).
- 913 71 Gozzelino, L., De Santis, M. C., Gulluni, F., Hirsch, E. & Martini, M. PI(3,4)P2 Signaling in  
914 Cancer and Metabolism. *Front Oncol* **10**, 360, doi:10.3389/fonc.2020.00360 (2020).
- 915 72 Kaplan, I. M., Wadia, J. S. & Dowdy, S. F. Cationic TAT peptide transduction domain enters  
916 cells by macropinocytosis. *J Control Release* **102**, 247-253, doi:10.1016/j.jconrel.2004.10.018  
917 (2005).
- 918 73 Wadia, J. S., Stan, R. V. & Dowdy, S. F. Transducible TAT-HA fusogenic peptide enhances  
919 escape of TAT-fusion proteins after lipid raft macropinocytosis. *Nat Med* **10**, 310-315,  
920 doi:10.1038/nm996 (2004).
- 921 74 Nakase, I., Niwa, M., Takeuchi, T., Sonomura, K., Kawabata, N., Koike, Y., Takehashi, M.,  
922 Tanaka, S., Ueda, K., Simpson, J. C., Jones, A. T., Sugiura, Y. & Futaki, S. Cellular uptake of  
923 arginine-rich peptides: roles for macropinocytosis and actin rearrangement. *Mol Ther* **10**,  
924 1011-1022, doi:10.1016/j.ymthe.2004.08.010 (2004).
- 925 75 Polyakov, V., Sharma, V., Dahlheimer, J. L., Pica, C. M., Luker, G. D. & Piwnica-Worms, D.  
926 Novel Tat-peptide chelates for direct transduction of technetium-99m and rhenium into  
927 human cells for imaging and radiotherapy. *Bioconjug Chem* **11**, 762-771,  
928 doi:10.1021/bc000008y (2000).
- 929 76 Kawaguchi, Y., Takeuchi, T., Kuwata, K., Chiba, J., Hatanaka, Y., Nakase, I. & Futaki, S.  
930 Syndecan-4 Is a Receptor for Clathrin-Mediated Endocytosis of Arginine-Rich Cell-Penetrating  
931 Peptides. *Bioconjug Chem* **27**, 1119-1130, doi:10.1021/acs.bioconjchem.6b00082 (2016).
- 932 77 Duchardt, F., Fotin-Mleczek, M., Schwarz, H., Fischer, R. & Brock, R. A comprehensive model  
933 for the cellular uptake of cationic cell-penetrating peptides. *Traffic* **8**, 848-866,  
934 doi:10.1111/j.1600-0854.2007.00572.x (2007).
- 935 78 Yamauchi, Y. & Helenius, A. Virus entry at a glance. *J Cell Sci* **126**, 1289-1295,  
936 doi:10.1242/jcs.119685 (2013).
- 937 79 Barbieri, M. A., Roberts, R. L., Gumusboga, A., Highfield, H., Alvarez-Dominguez, C., Wells, A.  
938 & Stahl, P. D. Epidermal growth factor and membrane trafficking. EGF receptor activation of  
939 endocytosis requires Rab5a. *J Cell Biol* **151**, 539-550 (2000).
- 940 80 Bucci, C., Lutcke, A., Steele-Mortimer, O., Olkkonen, V. M., Dupree, P., Chiariello, M., Bruni,  
941 C. B., Simons, K. & Zerial, M. Co-operative regulation of endocytosis by three Rab5 isoforms.  
942 *FEBS Lett* **366**, 65-71 (1995).
- 943 81 Roberts, R. L., Barbieri, M. A., Ullrich, J. & Stahl, P. D. Dynamics of rab5 activation in  
944 endocytosis and phagocytosis. *J Leukoc Biol* **68**, 627-632 (2000).
- 945 82 Schnatwinkel, C., Christoforidis, S., Lindsay, M. R., Uttenweiler-Joseph, S., Wilm, M., Parton,  
946 R. G. & Zerial, M. The Rab5 effector Rabankyrin-5 regulates and coordinates different  
947 endocytic mechanisms. *PLoS biology* **2**, E261-E261, doi:10.1371/journal.pbio.0020261 (2004).
- 948 83 Kalia, M., Kumari, S., Chadda, R., Hill, M. M., Parton, R. G. & Mayor, S. Arf6-independent GPI-  
949 anchored Protein-enriched Early Endosomal Compartments Fuse with Sorting Endosomes via  
950 a Rab5/Phosphatidylinositol-3' -Kinase-dependent Machinery. *Molecular Biology of the Cell*  
951 **17**, 3689-3704, doi:10.1091/mbc.e05-10-0980 (2006).
- 952 84 Duclos, S., Diez, R., Garin, J., Papadopoulou, B., Descoteaux, A., Stenmark, H. & Desjardins,  
953 M. Rab5 regulates the kiss and run fusion between phagosomes and endosomes and the  
954 acquisition of phagosome leishmanicidal properties in RAW 264.7 macrophages. *Journal of*  
955 *Cell Science* **113**, 3531-3541 (2000).
- 956 85 Pelkmans, L., Burli, T., Zerial, M. & Helenius, A. Caveolin-stabilized membrane domains as  
957 multifunctional transport and sorting devices in endocytic membrane traffic. *Cell* **118**, 767-  
958 780, doi:10.1016/j.cell.2004.09.003 (2004).
- 959 86 Smith, J. L., Campos, S. K., Wandinger-Ness, A. & Ozbun, M. A. Caveolin-1-Dependent  
960 Infectious Entry of Human Papillomavirus Type 31 in Human Keratinocytes Proceeds to the

- 961 Endosomal Pathway for pH-Dependent Uncoating. *Journal of Virology* **82**, 9505-9512,  
962 doi:10.1128/jvi.01014-08 (2008).
- 963 87 Frittoli, E., Palamidessi, A., Pizzigoni, A., Lanzetti, L., Garrè, M., Troglio, F., Troilo, A., Fukuda,  
964 M., Di Fiore, P. P., Scita, G. & Confalonieri, S. *The Primate-specific Protein TBC1D3 Is Required*  
965 *for Optimal Macropinocytosis in a Novel ARF6-dependent Pathway*. Vol. 19 (2008).
- 966 88 Homma, Y., Kinoshita, R., Kuchitsu, Y., Wawro, P. S., Marubashi, S., Oguchi, M. E., Ishida, M.,  
967 Fujita, N. & Fukuda, M. Comprehensive knockout analysis of the Rab family GTPases in  
968 epithelial cells. *J Cell Biol* **218**, 2035-2050, doi:10.1083/jcb.201810134 (2019).
- 969 89 Nishimura, K., Fukagawa, T., Takisawa, H., Kakimoto, T. & Kanemaki, M. An auxin-based  
970 degron system for the rapid depletion of proteins in nonplant cells. *Nat Methods* **6**, 917-922,  
971 doi:10.1038/nmeth.1401 (2009).
- 972 90 Simpson, J. C., Griffiths, G., Wessling-Resnick, M., Fransen, J. A., Bennett, H. & Jones, A. T. A  
973 role for the small GTPase Rab21 in the early endocytic pathway. *J Cell Sci* **117**, 6297-6311,  
974 doi:10.1242/jcs.01560 (2004).
- 975 91 Pellinen, T., Arjonen, A., Vuoriluoto, K., Kallio, K., Fransen, J. A. & Ivaska, J. Small GTPase  
976 Rab21 regulates cell adhesion and controls endosomal traffic of beta1-integrins. *J Cell Biol*  
977 **173**, 767-780, doi:10.1083/jcb.200509019 (2006).
- 978 92 Zhang, X., He, X., Fu, X. Y. & Chang, Z. Varp is a Rab21 guanine nucleotide exchange factor  
979 and regulates endosome dynamics. *J Cell Sci* **119**, 1053-1062, doi:10.1242/jcs.02810 (2006).
- 980 93 Junutula, J. R., De Maziere, A. M., Peden, A. A., Ervin, K. E., Advani, R. J., van Dijk, S. M.,  
981 Klumperman, J. & Scheller, R. H. Rab14 is involved in membrane trafficking between the  
982 Golgi complex and endosomes. *Mol Biol Cell* **15**, 2218-2229, doi:10.1091/mbc.e03-10-0777  
983 (2004).
- 984 94 Ullrich, O., Reinsch, S., Urbe, S., Zerial, M. & Parton, R. G. Rab11 regulates recycling through  
985 the pericentriolar recycling endosome. *J Cell Biol* **135**, 913-924 (1996).
- 986 95 Proikas-Cezanne, T., Gaugel, A., Frickey, T. & Nordheim, A. Rab14 is part of the early  
987 endosomal clathrin-coated TGN microdomain. *FEBS Lett* **580**, 5241-5246,  
988 doi:10.1016/j.febslet.2006.08.053 (2006).
- 989 96 Weimershaus, M., Mauvais, F. X., Saveanu, L., Adiko, C., Babdor, J., Abramova, A.,  
990 Montealegre, S., Lawand, M., Evnouchidou, I., Huber, K. J., Chadt, A., Zwick, M., Vargas, P.,  
991 Dussiot, M., Lennon-Dumenil, A. M., Brocker, T., Al-Hasani, H. & van Ender, P. Innate  
992 Immune Signals Induce Anterograde Endosome Transport Promoting MHC Class I Cross-  
993 Presentation. *Cell Rep* **24**, 3568-3581, doi:10.1016/j.celrep.2018.08.041 (2018).
- 994 97 Linford, A., Yoshimura, S., Nunes Bastos, R., Langemeyer, L., Gerondopoulos, A., Rigden, D. J.  
995 & Barr, F. A. Rab14 and its exchange factor FAM116 link endocytic recycling and adherens  
996 junction stability in migrating cells. *Dev Cell* **22**, 952-966, doi:10.1016/j.devcel.2012.04.010  
997 (2012).
- 998 98 Kauppi, M., Simonsen, A., Bremnes, B., Vieira, A., Callaghan, J., Stenmark, H. & Olkkonen, V.  
999 M. The small GTPase Rab22 interacts with EEA1 and controls endosomal membrane  
1000 trafficking. *J Cell Sci* **115**, 899-911 (2002).
- 1001 99 Rodriguez-Gabin, A. G., Cammer, M., Almazan, G., Charron, M. & Larocca, J. N. Role of  
1002 rRAB22b, an oligodendrocyte protein, in regulation of transport of vesicles from trans Golgi  
1003 to endocytic compartments. *J Neurosci Res* **66**, 1149-1160, doi:10.1002/jnr.1253 (2001).
- 1004 100 Mishra, A., Eathiraj, S., Corvera, S. & Lambright, D. G. Structural basis for Rab GTPase  
1005 recognition and endosome tethering by the C2H2 zinc finger of Early Endosomal Autoantigen  
1006 1 (EEA1). *Proc Natl Acad Sci U S A* **107**, 10866-10871, doi:10.1073/pnas.1000843107 (2010).
- 1007 101 Di Nardo, A. A., Fuchs, J., Joshi, R. L., Moya, K. L. & Prochiantz, A. The Physiology of  
1008 Homeoprotein Transduction. *Physiol Rev* **98**, 1943-1982, doi:10.1152/physrev.00018.2017  
1009 (2018).
- 1010 102 Prochiantz, A. & Di Nardo, A. A. Homeoprotein signaling in the developing and adult nervous  
1011 system. *Neuron* **85**, 911-925, doi:10.1016/j.neuron.2015.01.019 (2015).

- 1012 103 Spatazza, J., Di Lullo, E., Joliot, A., Dupont, E., Moya, K. L. & Prochiantz, A. Homeoprotein  
1013 signaling in development, health, and disease: a shaking of dogmas offers challenges and  
1014 promises from bench to bed. *Pharmacol Rev* **65**, 90-104, doi:10.1124/pr.112.006577 (2013).
- 1015 104 Sagan, S., Burlina, F., Alves, I. D., Bechara, C., Dupont, E. & Joliot, A. Homeoproteins and  
1016 homeoprotein-derived peptides: going in and out. *Curr Pharm Des* **19**, 2851-2862,  
1017 doi:10.2174/1381612811319160002 (2013).
- 1018 105 Rekaik, H., Blaudin de The, F. X., Fuchs, J., Massiani-Beaudoin, O., Prochiantz, A. & Joshi, R. L.  
1019 Engrailed Homeoprotein Protects Mesencephalic Dopaminergic Neurons from Oxidative  
1020 Stress. *Cell Rep* **13**, 242-250, doi:10.1016/j.celrep.2015.08.076 (2015).
- 1021 106 Rekaik, H., Blaudin de The, F. X., Prochiantz, A., Fuchs, J. & Joshi, R. L. Dissecting the role of  
1022 Engrailed in adult dopaminergic neurons--Insights into Parkinson disease pathogenesis. *FEBS*  
1023 *Lett* **589**, 3786-3794, doi:10.1016/j.febslet.2015.10.002 (2015).
- 1024 107 Blaudin de The, F. X., Rekaik, H., Peze-Heidsieck, E., Massiani-Beaudoin, O., Joshi, R. L., Fuchs,  
1025 J. & Prochiantz, A. Engrailed homeoprotein blocks degeneration in adult dopaminergic  
1026 neurons through LINE-1 repression. *EMBO J* **37**, doi:10.15252/embj.201797374 (2018).
- 1027 108 Alvarez-Fischer, D., Fuchs, J., Castagner, F., Stettler, O., Massiani-Beaudoin, O., Moya, K. L.,  
1028 Bouillot, C., Oertel, W. H., Lombes, A., Faigle, W., Joshi, R. L., Hartmann, A. & Prochiantz, A.  
1029 Engrailed protects mouse midbrain dopaminergic neurons against mitochondrial complex I  
1030 insults. *Nat Neurosci* **14**, 1260-1266, doi:10.1038/nn.2916 (2011).
- 1031 109 Sugiyama, S., Di Nardo, A. A., Aizawa, S., Matsuo, I., Volovitch, M., Prochiantz, A. & Hensch, T.  
1032 K. Experience-dependent transfer of Otx2 homeoprotein into the visual cortex activates  
1033 postnatal plasticity. *Cell* **134**, 508-520, doi:10.1016/j.cell.2008.05.054 (2008).
- 1034 110 Torero Ibad, R., Rheey, J., Mrejen, S., Forster, V., Picaud, S., Prochiantz, A. & Moya, K. L. Otx2  
1035 promotes the survival of damaged adult retinal ganglion cells and protects against excitotoxic  
1036 loss of visual acuity in vivo. *J Neurosci* **31**, 5495-5503, doi:10.1523/JNEUROSCI.0187-11.2011  
1037 (2011).
- 1038 111 Minois, N., Carmona-Gutierrez, D. & Madeo, F. Polyamines in aging and disease. *Aging*  
1039 (*Albany NY*) **3**, 716-732, doi:10.18632/aging.100361 (2011).
- 1040 112 Miller-Fleming, L., Olin-Sandoval, V., Campbell, K. & Ralser, M. Remaining Mysteries of  
1041 Molecular Biology: The Role of Polyamines in the Cell. *J Mol Biol* **427**, 3389-3406,  
1042 doi:10.1016/j.jmb.2015.06.020 (2015).
- 1043 113 Arruabarrena-Aristorena, A., Zabala-Letona, A. & Carracedo, A. Oil for the cancer engine: The  
1044 cross-talk between oncogenic signaling and polyamine metabolism. *Sci Adv* **4**, eaar2606,  
1045 doi:10.1126/sciadv.aar2606 (2018).
- 1046 114 Handa, A. K., Fatima, T. & Mattoo, A. K. Polyamines: Bio-Molecules with Diverse Functions in  
1047 Plant and Human Health and Disease. *Front Chem* **6**, 10, doi:10.3389/fchem.2018.00010  
1048 (2018).
- 1049 115 Ramani, D., De Bandt, J. P. & Cynober, L. Aliphatic polyamines in physiology and diseases. *Clin*  
1050 *Nutr* **33**, 14-22, doi:10.1016/j.clnu.2013.09.019 (2014).
- 1051 116 Soulet, D., Covassin, L., Kaouass, M., Charest-Gaudreault, R., Audette, M. & Poulin, R. Role of  
1052 endocytosis in the internalization of spermidine-C(2)-BODIPY, a highly fluorescent probe of  
1053 polyamine transport. *Biochem J* **367**, 347-357, doi:10.1042/BJ20020764 (2002).
- 1054 117 Soulet, D., Gagnon, B., Rivest, S., Audette, M. & Poulin, R. A fluorescent probe of polyamine  
1055 transport accumulates into intracellular acidic vesicles via a two-step mechanism. *J Biol Chem*  
1056 **279**, 49355-49366, doi:10.1074/jbc.M401287200 (2004).
- 1057 118 Uemura, T., Stringer, D. E., Blohm-Mangone, K. A. & Gerner, E. W. Polyamine transport is  
1058 mediated by both endocytic and solute carrier transport mechanisms in the gastrointestinal  
1059 tract. *Am J Physiol Gastrointest Liver Physiol* **299**, G517-522, doi:10.1152/ajpgi.00169.2010  
1060 (2010).
- 1061 119 van Veen, S., Martin, S., Van den Haute, C., Benoy, V., Lyons, J., Vanhoutte, R., Kahler, J. P.,  
1062 Decuypere, J. P., Gelders, G., Lambie, E., Zielich, J., Swinnen, J. V., Annaert, W., Agostinis, P.,

- 1063 Ghesquiere, B., Verhelst, S., Baekelandt, V., Eggermont, J. & Vangheluwe, P. ATP13A2  
1064 deficiency disrupts lysosomal polyamine export. *Nature* **578**, 419-424, doi:10.1038/s41586-  
1065 020-1968-7 (2020).
- 1066 120 Klopper, T. H., Kienle, N., Fasshauer, D. & Munro, S. Untangling the evolution of Rab G  
1067 proteins: implications of a comprehensive genomic analysis. *BMC Biol* **10**, 71,  
1068 doi:10.1186/1741-7007-10-71 (2012).
- 1069 121 Palm, W. Metabolic functions of macropinocytosis. *Philos Trans R Soc Lond B Biol Sci* **374**,  
1070 20180285, doi:10.1098/rstb.2018.0285 (2019).
- 1071 122 Toshima, J. Y., Nishinoaki, S., Sato, Y., Yamamoto, W., Furukawa, D., Siekhaus, D. E.,  
1072 Sawaguchi, A. & Toshima, J. Bifurcation of the endocytic pathway into Rab5-dependent and -  
1073 independent transport to the vacuole. *Nat Commun* **5**, 3498, doi:10.1038/ncomms4498  
1074 (2014).
- 1075 123 Shimamura, H., Nagano, M., Nakajima, K., Toshima, J. Y. & Toshima, J. Rab5-independent  
1076 activation and function of yeast Rab7-like protein, Ypt7p, in the AP-3 pathway. *PLoS One* **14**,  
1077 e0210223, doi:10.1371/journal.pone.0210223 (2019).
- 1078 124 Tebaldi, G., Pritchard, S. M. & Nicola, A. V. Herpes Simplex Virus Entry by a Nonconventional  
1079 Endocytic Pathway. *J Virol* **94**, doi:10.1128/JVI.01910-20 (2020).
- 1080 125 Castano-Rodriguez, C., Honrubia, J. M., Gutierrez-Alvarez, J., DeDiego, M. L., Nieto-Torres, J.  
1081 L., Jimenez-Guardeno, J. M., Regla-Nava, J. A., Fernandez-Delgado, R., Verdia-Baguena, C.,  
1082 Queralt-Martin, M., Kochan, G., Perlman, S., Aguilera, V. M., Sola, I. & Enjuanes, L. Role of  
1083 Severe Acute Respiratory Syndrome Coronavirus Viroporins E, 3a, and 8a in Replication and  
1084 Pathogenesis. *MBio* **9**, doi:10.1128/mBio.02325-17 (2018).
- 1085 126 Quirin, K., Eschli, B., Scheu, I., Poort, L., Kartenbeck, J. & Helenius, A. Lymphocytic  
1086 choriomeningitis virus uses a novel endocytic pathway for infectious entry via late  
1087 endosomes. *Virology* **378**, 21-33, doi:S0042-6822(08)00294-8 [pii]  
1088 10.1016/j.virol.2008.04.046 (2008).
- 1089 127 Rojek, J. M., Perez, M. & Kunz, S. Cellular entry of lymphocytic choriomeningitis virus. *J Virol*  
1090 **82**, 1505-1517, doi:10.1128/JVI.01331-07 (2008).
- 1091 128 Kunz, S. Receptor binding and cell entry of Old World arenaviruses reveal novel aspects of  
1092 virus-host interaction. *Virology* **387**, 245-249, doi:10.1016/j.virol.2009.02.042 (2009).
- 1093 129 Pasqual, G., Rojek, J. M., Masin, M., Chatton, J. Y. & Kunz, S. Old world arenaviruses enter the  
1094 host cell via the multivesicular body and depend on the endosomal sorting complex required  
1095 for transport. *PLoS Pathog* **7**, e1002232, doi:10.1371/journal.ppat.1002232 (2011).
- 1096 130 Kunz, S. & de la Torre, J. C. Breaking the Barrier: Host Cell Invasion by Lujo Virus. *Cell Host*  
1097 *Microbe* **22**, 583-585, doi:10.1016/j.chom.2017.10.014 (2017).
- 1098 131 Raaben, M., Jae, L. T., Herbert, A. S., Kuehne, A. I., Stubbs, S. H., Chou, Y. Y., Blomen, V. A.,  
1099 Kirchhausen, T., Dye, J. M., Brummelkamp, T. R. & Whelan, S. P. NRP2 and CD63 Are Host  
1100 Factors for Lujo Virus Cell Entry. *Cell Host Microbe* **22**, 688-696 e685,  
1101 doi:10.1016/j.chom.2017.10.002 (2017).
- 1102 132 Wu, Q. M., Liu, S. L., Chen, G., Zhang, W., Sun, E. Z., Xiao, G. F., Zhang, Z. L. & Pang, D. W.  
1103 Uncovering the Rab5-Independent Autophagic Trafficking of Influenza A Virus by Quantum-  
1104 Dot-Based Single-Virus Tracking. *Small* **14**, e1702841, doi:10.1002/smll.201702841 (2018).
- 1105 133 Fan, J., Liu, X., Mao, F., Yue, X., Lee, I. & Xu, Y. Proximity proteomics identifies novel function  
1106 of Rab14 in trafficking of Ebola virus matrix protein VP40. *Biochem Biophys Res Commun* **527**,  
1107 387-392, doi:10.1016/j.bbrc.2020.04.041 (2020).
- 1108 134 Okai, B., Lyall, N., Gow, N. A., Bain, J. M. & Erwig, L. P. Rab14 regulates maturation of  
1109 macrophage phagosomes containing the fungal pathogen *Candida albicans* and outcome of  
1110 the host-pathogen interaction. *Infect Immun* **83**, 1523-1535, doi:10.1128/IAI.02917-14  
1111 (2015).
- 1112 135 Mrozowska, P. S. & Fukuda, M. Regulation of podocalyxin trafficking by Rab small GTPases in  
1113 2D and 3D epithelial cell cultures. *J Cell Biol* **213**, 355-369, doi:10.1083/jcb.201512024 (2016).

1114 136 Jordan, M., Schallhorn, A. & Wurm, F. M. Transfecting mammalian cells: optimization of  
1115 critical parameters affecting calcium-phosphate precipitate formation. *Nucleic Acids Res* **24**,  
1116 596-601 (1996).

1117

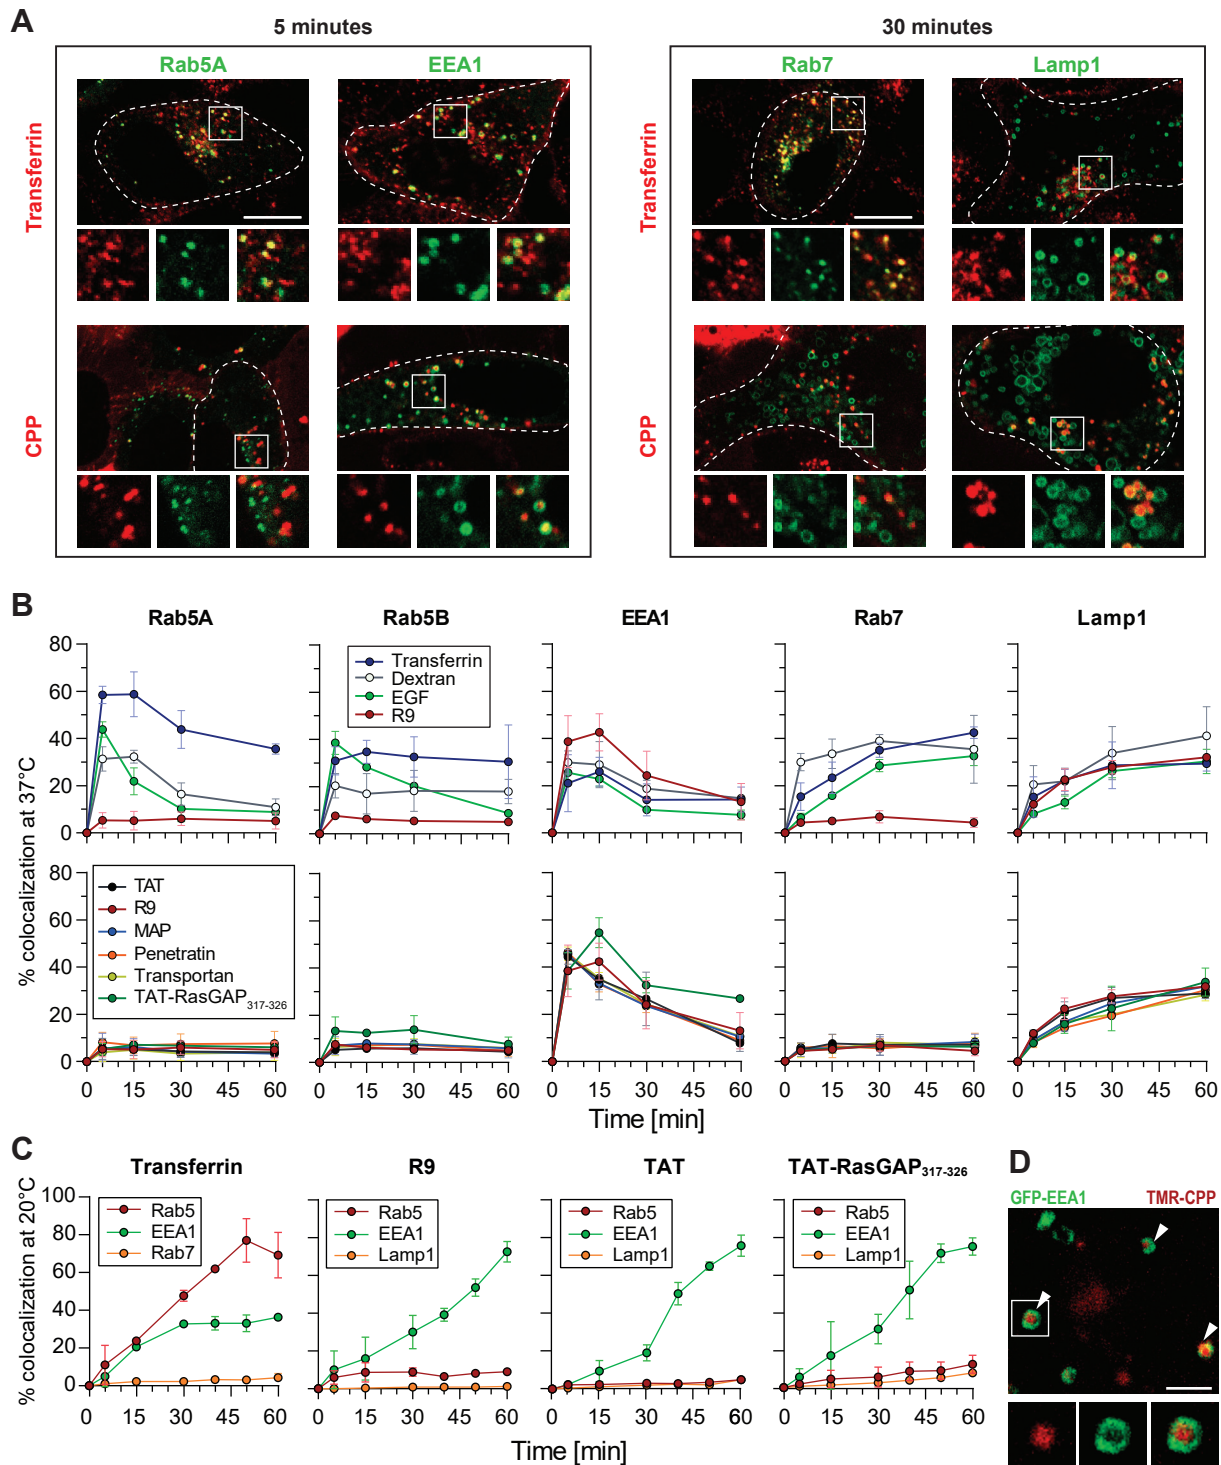

Figure 1

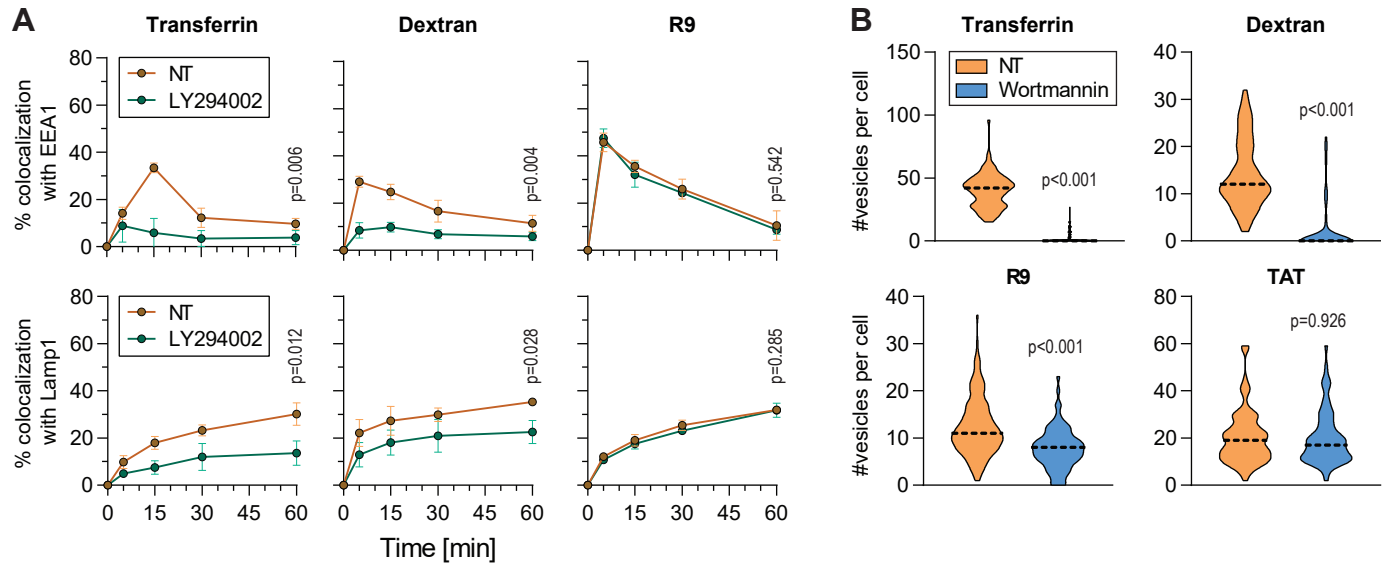

**Figure 2**

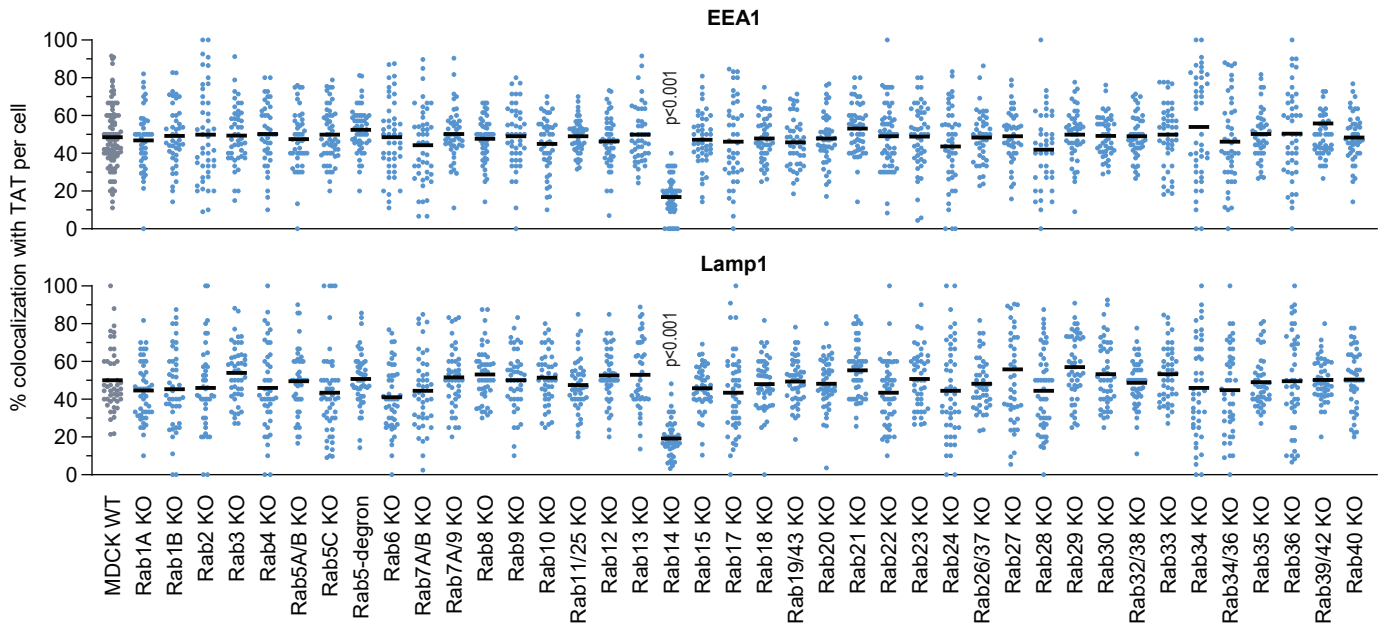

Figure 3



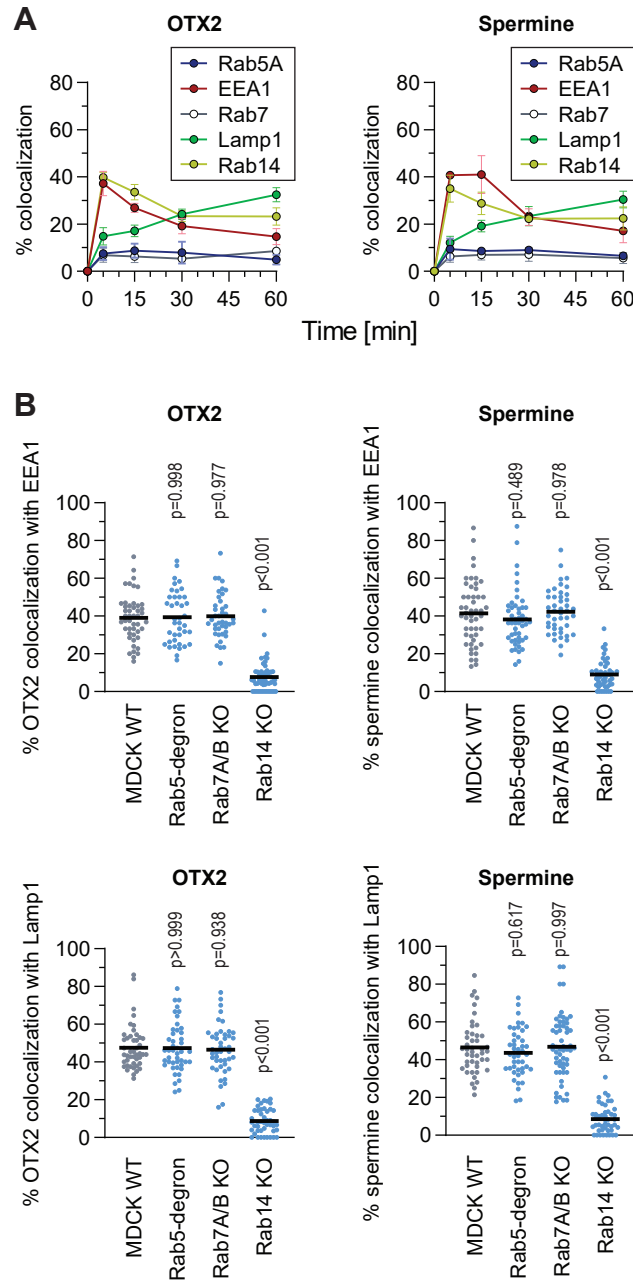

**Figure 4**

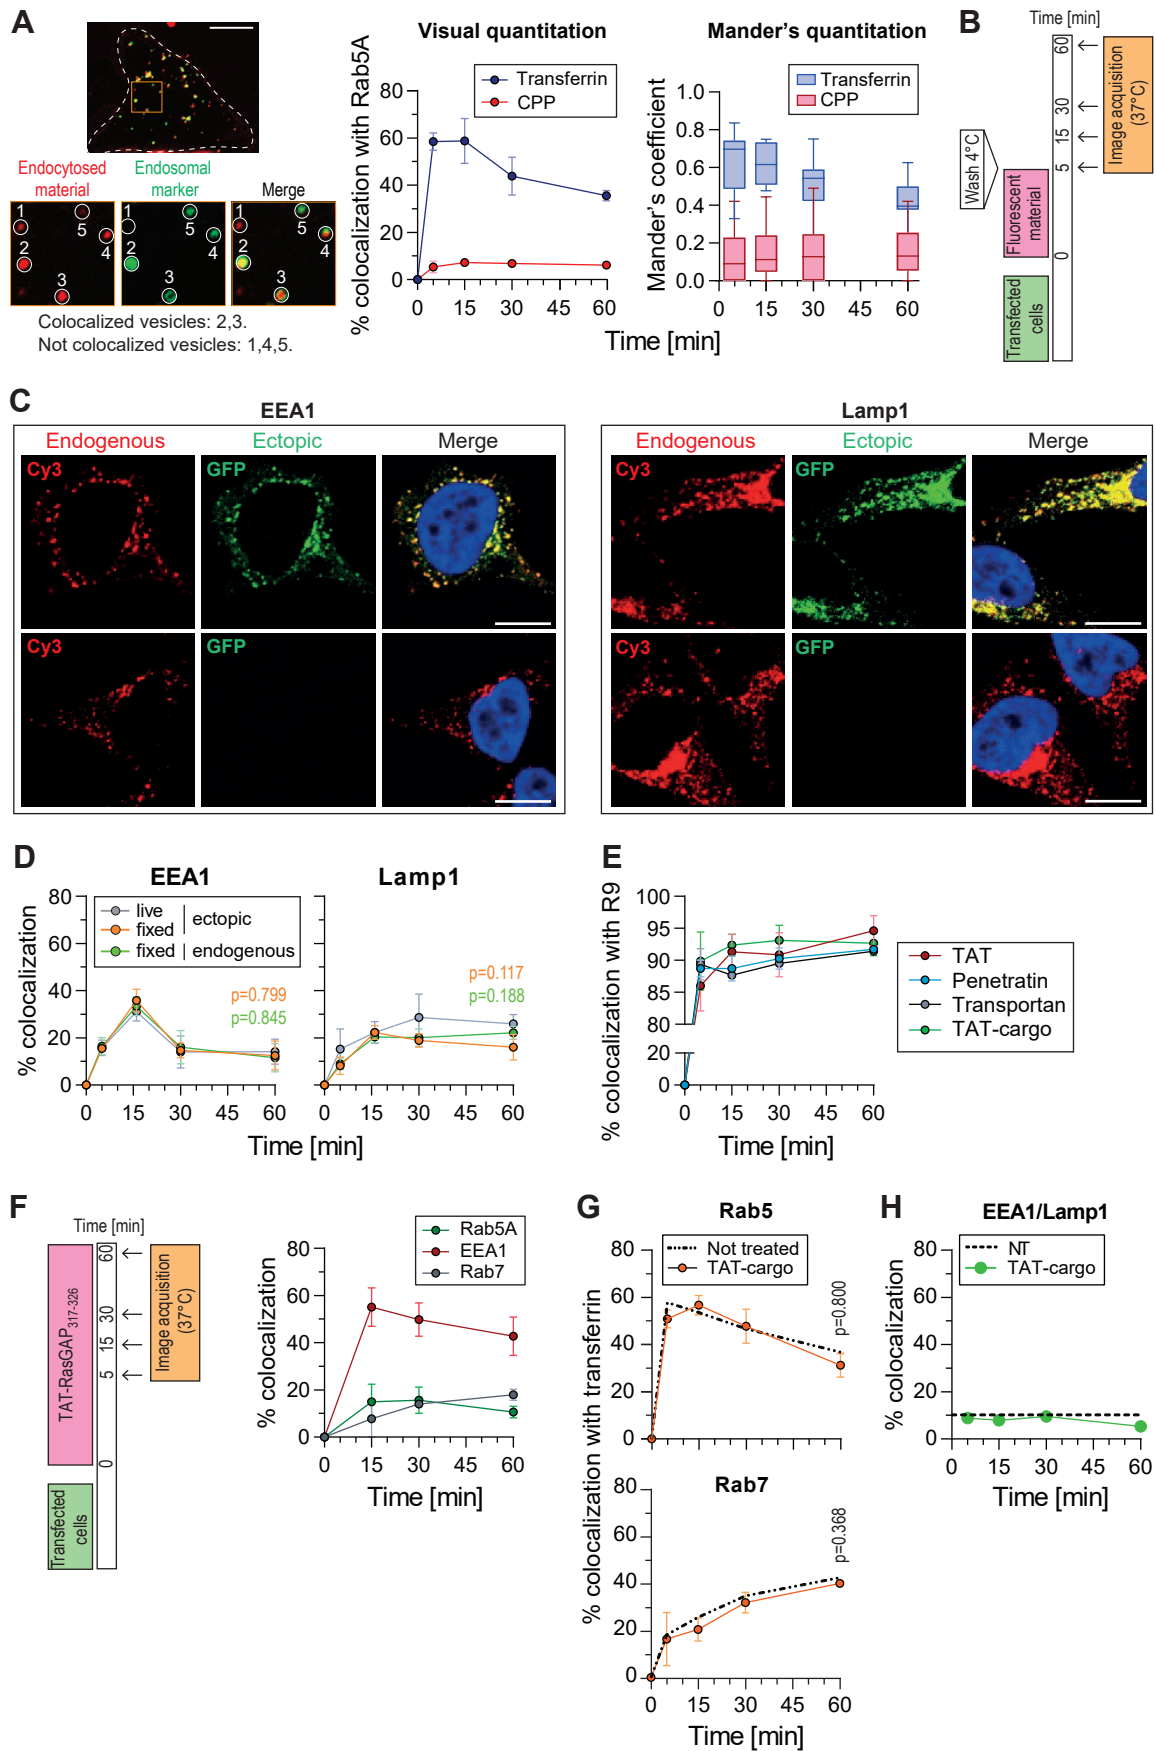

Figure S1

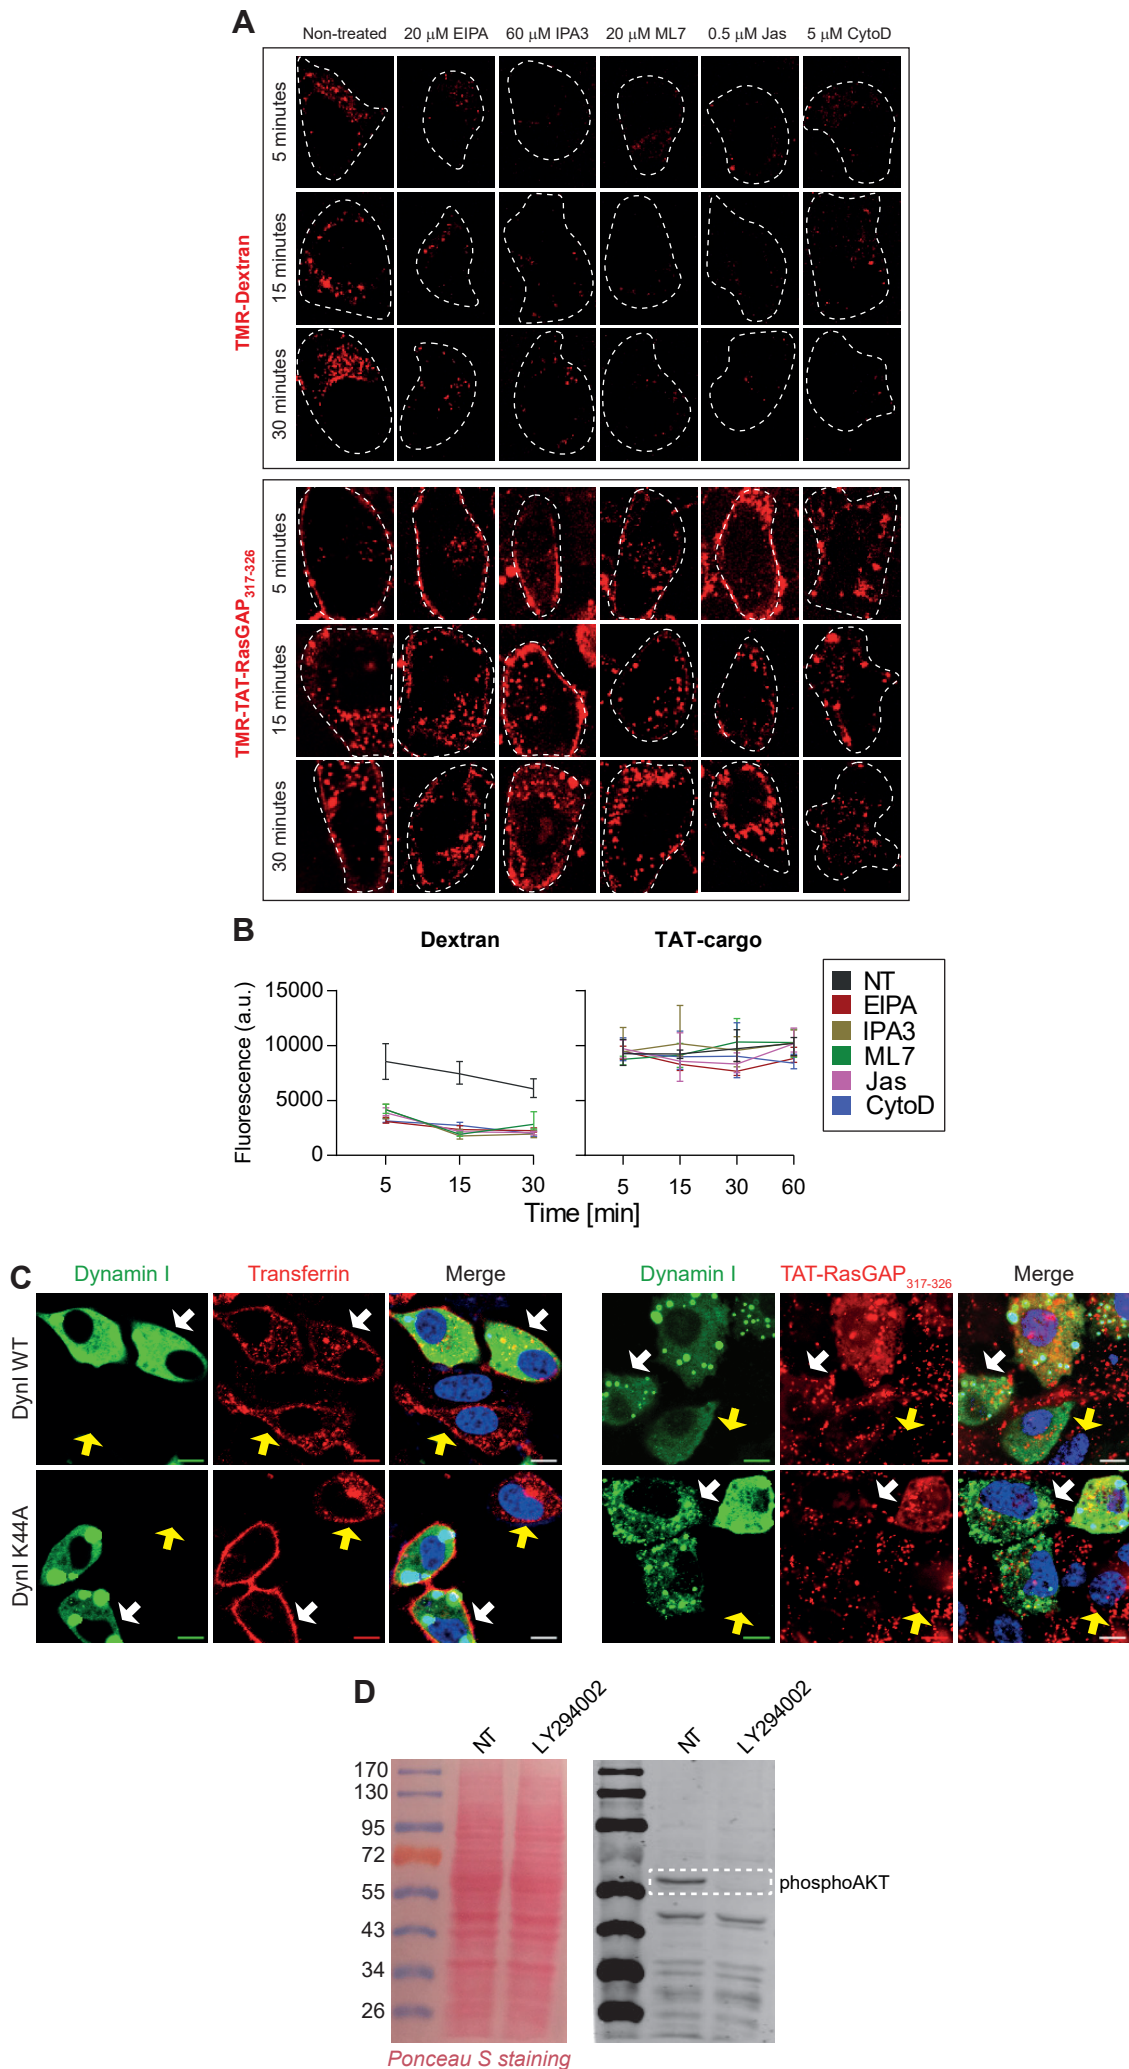

Figure S2

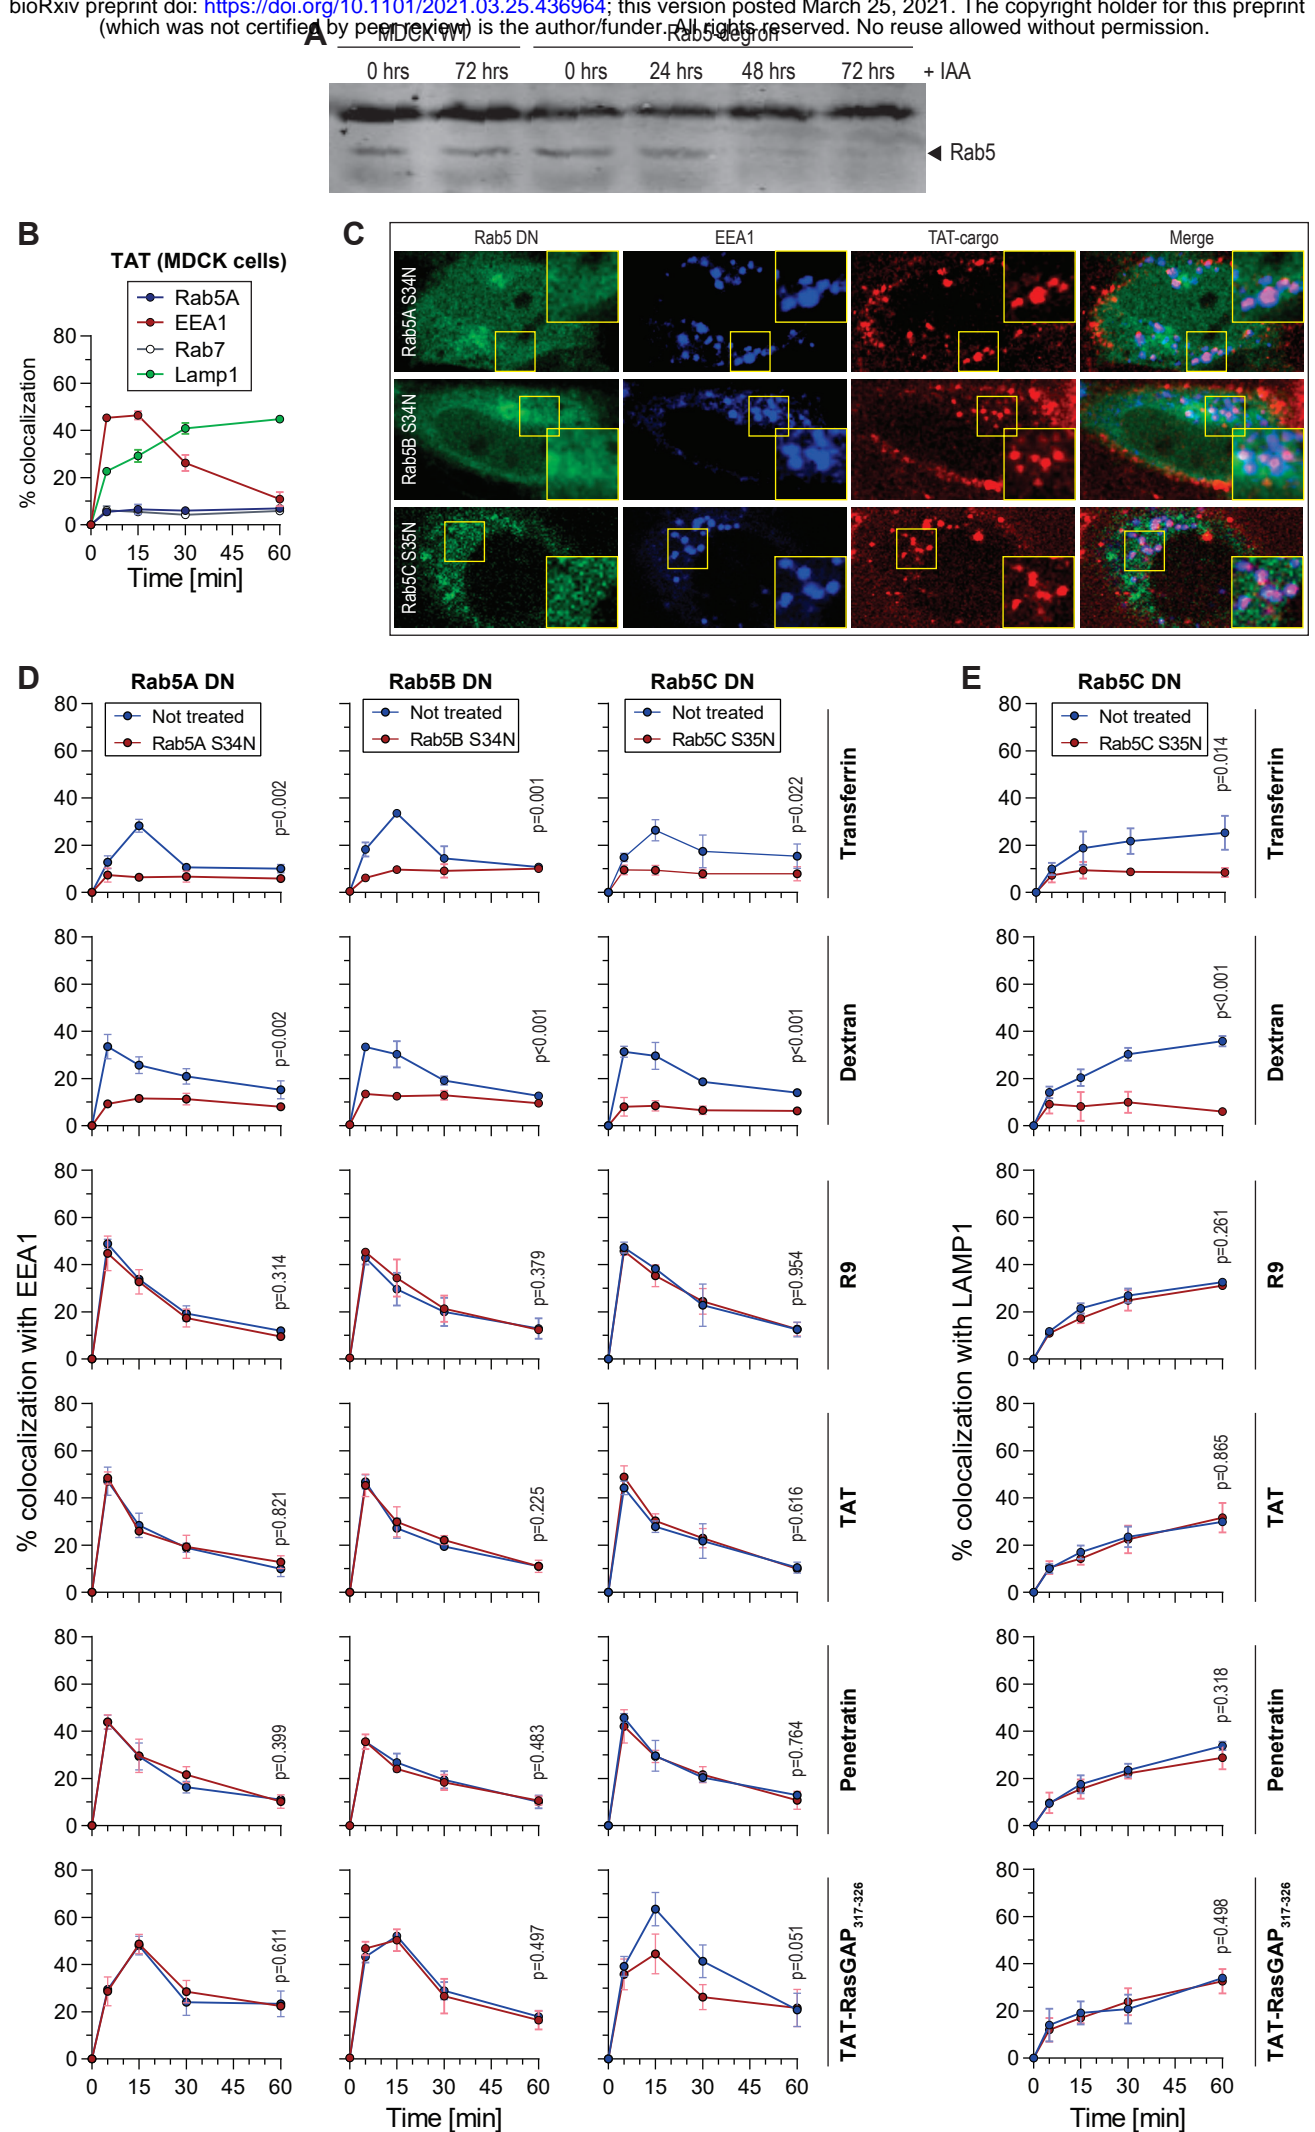

Figure S3

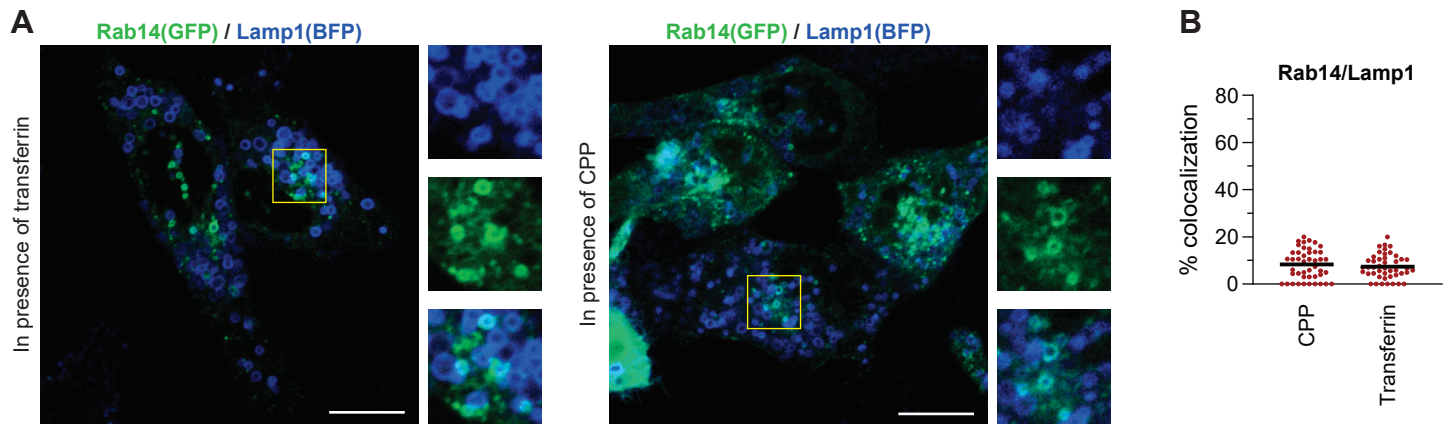

Figure S4

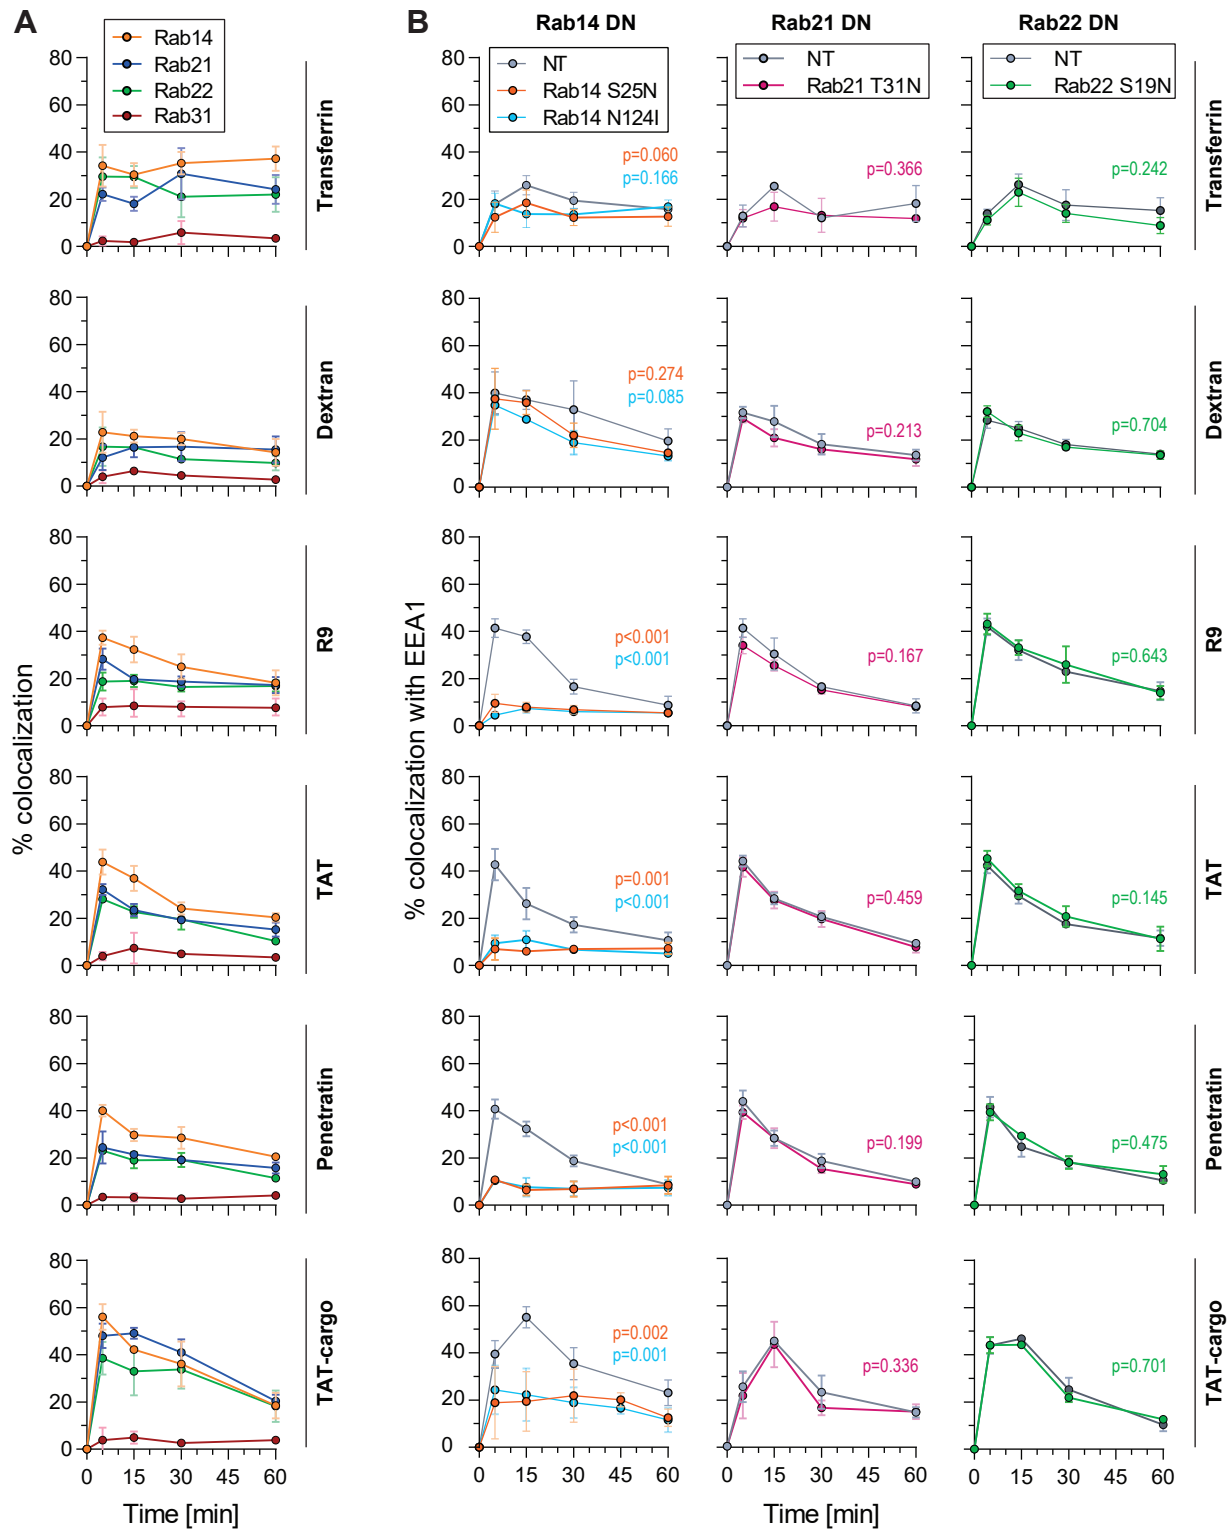

Figure S5

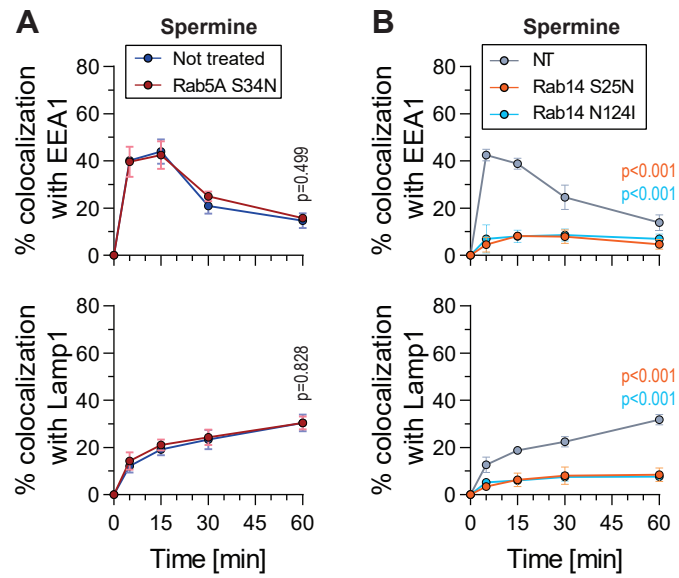

Figure S6
